# Supplementary material for: Sequence and structural evolution of the KsgA/Dim1 methyltransferase family
Source: PubMed Central journal article supplement (PMC2614427; doi:10.1186/1756-0500-1-108), 2008-10-29
Supplement: 1756-0500-1-108-S1.pdf [file 1756-0500-1-108-S1.pdf]

T-COFFEE, Version\_5.31Fri Oct 26 17:01:36 2007

Cedric Notredame

CPU TIME:119 sec.

SCORE=42

\*

BAD AVG GOOD

\*

|         |   |    |
|---------|---|----|
| atDim1  | : | 47 |
| ddDim1  | : | 46 |
| lbDim1  | : | 43 |
| glDim1  | : | 44 |
| pvDim1  | : | 44 |
| hsDim1  | : | 47 |
| scDim1  | : | 44 |
| atPFC1  | : | 40 |
| dmTFB1  | : | 39 |
| ceTFB1  | : | 38 |
| hsTFB1  | : | 39 |
| mkDim1  | : | 44 |
| mthDim1 | : | 45 |
| hwDim1  | : | 42 |
| mmaDim1 | : | 43 |
| mjDim1  | : | 43 |
| phDim1  | : | 43 |
| msDim1  | : | 41 |
| ptDim1  | : | 43 |
| afDim1  | : | 46 |
| apDim1  | : | 38 |
| ssDim1  | : | 29 |
| paDim1  | : | 43 |
| csDim1  | : | 37 |
| seKsgA  | : | 43 |
| bKsgA   | : | 43 |
| mtuKsgA | : | 40 |
| ttKsgA  | : | 41 |
| bfKsgA  | : | 44 |
| ctKsgA  | : | 40 |
| bbKsgA  | : | 41 |
| ecKsgA  | : | 44 |
| cons    | : | 42 |

|         |   |                                                     |    |
|---------|---|-----------------------------------------------------|----|
| atDim1  | 1 | M-----AGGKIRKEK-----                                | 10 |
| ddDim1  | 1 | -----MVKPVKIG                                       | 8  |
| lbDim1  | 1 | -MPKEPRAVP-MGIICAEPHAASRK-----IKFSTKV               | 31 |
| glDim1  | 1 | -----                                               | 0  |
| pvDim1  | 1 | -MRAGGLALL-RNLQNALSSSSAAKMKPKRGYHQGVANKPVS-ILKNVSDA | 48 |
| hsDim1  | 1 | -MPKV-----                                          | 4  |
| scDim1  | 1 | -MGKA-----                                          | 4  |
| atPFC1  | 1 | -----MMNAVITSATINCNSLSPSWTCGDNSPSKLLLGEISAA         | 38 |
| dmTFB1  | 1 | MAQPSARVLQSGMRLP-----                               | 16 |
| ceTFB1  | 1 | -----MA-SASRLP-----                                 | 8  |
| hsTFB1  | 1 | -MAASGKLS-TCRLP-----                                | 13 |
| mkDim1  | 1 | -----                                               | 0  |
| mthDim1 | 1 | -----                                               | 0  |
| hwDim1  | 1 | -MTDA-----TSG-----SDPDSTTP                          | 15 |
| mmaDim1 | 1 | -----                                               | 0  |
| mjDim1  | 1 | -----                                               | 0  |
| phDim1  | 1 | -MSSR-----IRINTK-----                               | 10 |
| msDim1  | 1 | -----                                               | 0  |
| ptDim1  | 1 | -----                                               | 0  |
| afDim1  | 1 | -----                                               | 0  |
| apDim1  | 1 | MPP-GSG-RGGRRR-----                                 | 12 |
| ssDim1  | 1 | -----                                               | 0  |
| paDim1  | 1 | -----                                               | 0  |
| csDim1  | 1 | -----                                               | 0  |
| seKsgA  | 1 | -----                                               | 0  |
| bKsgA   | 1 | -----MNKDIA-----                                    | 6  |
| mtuKsgA | 1 | MCCTSGCAL-TIRLL-----                                | 14 |
| ttKsgA  | 1 | -----MSKLA-----                                     | 5  |
| bfKsgA  | 1 | -----                                               | 0  |
| ctKsgA  | 1 | -MARS-----                                          | 4  |
| bbKsgA  | 1 | -MILSLLS-MNINYN-----                                | 13 |
| ecKsgA  | 1 | -----                                               | 0  |
| cons    | 1 | -----                                               | 51 |

|         |    |                                                    |     |
|---------|----|----------------------------------------------------|-----|
| atDim1  | 11 | -----PKASNRAPSNHYQGGISFHKSKGQHILKN                 | 39  |
| ddDim1  | 9  | VDAKV-----EKTKSATAARHHEFQMNKSYGQHLLKN              | 40  |
| lbDim1  | 32 | ITLGKSTPQG-HRRGAAAGRQEKAGPGVRAGGSQSGIVFNKGFGQHILKN | 81  |
| glDim1  | 1  | -----MQGFELTKQHGQHLLAN                             | 17  |
| pvDim1  | 49 | IGKKKSAPQG-GNASRHI STSKPK-----SGNKMMNMIYKKHGQHLLKN | 91  |
| hsDim1  | 5  | ---KSGAIG-RRRGR-----QEQRRELKSAGGLMFNTGIGQHILKN     | 41  |
| scDim1  | 5  | ---AKKKYS-G-----ATSSKQVSAEKHLS SVFKFNTDLGQHILKN    | 41  |
| atPFC1  | 39 | LSRRRTVKVSCGKSSPDDYHSTL-----KSLNSRGRFPRKSLGQHYMLN  | 82  |
| dmTFB1  | 17 | -----PMPTIRELVKLYRLQARKQLSQNFLMD                   | 43  |
| ceTFB1  | 9  | -----PLPALRDFIHMYRLRAKKILSQNYLMD                   | 35  |
| hsTFB1  | 14 | -----PLPTIREIIKLLRLQAAKQLSQNFLLD                   | 40  |
| mkDim1  | 1  | -----MRSVEYLYLRSKYGIRPRRRLGQHFMVD                  | 29  |
| mthDim1 | 1  | -----MKSGQHFLTD                                    | 10  |
| hwDim1  | 16 | VDLT-----GEDFRDPDALRRRRAGVSGDPNFDQHFLID            | 48  |
| mmaDim1 | 1  | -----MSAPRDQHFLVD                                  | 12  |
| mjDim1  | 1  | -----MFKPKKKLGGCFLID                               | 15  |
| phDim1  | 11 | ---SLLVQP-GYSGS-----KMRDRLF FLLSKYGIRPRDSIGQHFLII  | 49  |
| msDim1  | 1  | -----MSNTKEILEKYNIKLDTNKSQNYLID                    | 26  |
| ptDim1  | 1  | -----MKFSRKYGQVFLKN                                | 14  |
| afDim1  | 1  | -----MKLRKSLGQHMLVD                                | 14  |
| apDim1  | 13 | -----AESLVREVLGLAGLRPSDRLGQHFLID                   | 39  |
| ssDim1  | 1  | -----MD                                            | 2   |
| paDim1  | 1  | -----MKRRRLAQHFLRD                                 | 13  |
| csDim1  | 1  | -----MRS                                           | 3   |
| seKsgA  | 1  | -----MPARKRFGQHWLRS                                | 14  |
| bKsgA   | 7  | -----TPIRTKEILKKYGFSFKKSLGQNFLID                   | 33  |
| mtuKsgA | 15 | -----GRTEIRRLAKELDFRPRKSLGQNFVHD                   | 41  |
| ttKsgA  | 6  | -----SPQSVRALLERHGLFADKRFGQNFVLS                   | 32  |
| bfKsgA  | 1  | -----MKLVKPKKFLGQHFLKD                             | 17  |
| ctKsgA  | 5  | -----SIEQLTSFLRSVNGRAKKALSQNFVLD                   | 31  |
| bbKsgA  | 14 | -----SITSIKQTLKERKIAPRKLWGQNYLIN                   | 40  |
| ecKsgA  | 1  | -----MNNRVHQGH LARKRFRGQNF LND                     | 22  |
| cons    | 52 | -----                                              | 102 |

|         |     |               |       |                        |                         |   |                |       |    |   |     |   |   |   |   |   |   |    |
|---------|-----|---------------|-------|------------------------|-------------------------|---|----------------|-------|----|---|-----|---|---|---|---|---|---|----|
| atDim1  | 40  | PLLVDSIVQK    | ---   | AGIKSTDVILEIGPGTGNLT   | TKKLEA                  | - | GKEVIAVELDS    | 86    |    |   |     |   |   |   |   |   |   |    |
| ddDim1  | 41  | PLIIDAIVDK    | ---   | SQKSTDTVLEIGPGTGNLTMK  | LLEN                    | - | CKKVIAIEVDP    | 87    |    |   |     |   |   |   |   |   |   |    |
| lbDim1  | 82  | PLVIAAIVEK    | ---   | SAIKPTDVVVEIGPGTGNL    | TEKLLQT                 | - | AKKVIAFEIDP    | 128   |    |   |     |   |   |   |   |   |   |    |
| glDim1  | 18  | PLVIKSIVEK    | ---   | AEIRSTDTVLEIGPGTGNL    | TLALLEK                 | - | ARHVIAIEIDP    | 64    |    |   |     |   |   |   |   |   |   |    |
| pvDim1  | 92  | PGILDKILLA    | ---   | AKIKSSDVVLEIGCGTGNL    | TVKLLPI                 | - | AKKVITIDIDA    | 138   |    |   |     |   |   |   |   |   |   |    |
| hsDim1  | 42  | PLIINSIIDK    | ---   | AALRPD                 | VVLEVGPGTGNMTVKLLEK     | - | AKKVVACELDP    | 88    |    |   |     |   |   |   |   |   |   |    |
| scDim1  | 42  | PLVAQGIVDK    | ---   | AQIRPS                 | DDVVLEVGPGTGNLTVRILEQ   | - | AKNVVAVEMDP    | 88    |    |   |     |   |   |   |   |   |   |    |
| atPFC1  | 83  | SDINDQLASA    | ---   | ADVKEGDFVLEIGPGTGSL    | TNVLINL                 | - | GATVLAIEKDP    | 129   |    |   |     |   |   |   |   |   |   |    |
| dmTFB1  | 44  | ERLTDKIVKSA   | ---   | GRIDPRDLVLEVGPGGGITRS  | ILRRHP                  | Q | RRLLLVEKDP     | 92    |    |   |     |   |   |   |   |   |   |    |
| ceTFB1  | 36  | MNITRKIAKH    | ---   | AKVIEKDWVIEIGPGGGITRA  | ILEAGAS                 | R | LDVVEIDN       | 83    |    |   |     |   |   |   |   |   |   |    |
| hsTFB1  | 41  | LRLTDKIVRK    | ---   | AGNLTNAYVVEVGPGGGITRS  | ILNADVA                 | E | LLVVEKDT       | 88    |    |   |     |   |   |   |   |   |   |    |
| mkDim1  | 30  | DNILEFMVEA    | ---   | AEVREDDIVLEIGPGPGLLTRY | LMTR                    | - | AGQVIAVELDG    | 76    |    |   |     |   |   |   |   |   |   |    |
| mthDim1 | 11  | RGIAERIAGY    | ---   | AEISPSDRILEIGPGKGS     | LTEFLAAR                | - | AGRVYAI EADP   | 57    |    |   |     |   |   |   |   |   |   |    |
| hwDim1  | 49  | DRVLDRIPTYL   | ---   | LDSTDTTHILEIGAGTGALTDR | LLAV                    | - | GDTVTVIERDA    | 96    |    |   |     |   |   |   |   |   |   |    |
| mmaDim1 | 13  | RRAVEKIAGF    | ---   | VDVS                   | -GRRVLEIGPGE            | G | ILTRALLDR      | 58    |    |   |     |   |   |   |   |   |   |    |
| mjDim1  | 16  | KNFVNKAVES    | ---   | ANLTKDDVVLEIGLGK       | GILTEELAKN              | - | AKKVYVIEIDK    | 62    |    |   |     |   |   |   |   |   |   |    |
| phDim1  | 50  | EDVIEKAIET    | ---   | ANVNENDVILEVGPGLGFLT   | DELAKR                  | - | AKKVYTI EIDQ   | 96    |    |   |     |   |   |   |   |   |   |    |
| msDim1  | 27  | DNKLNIILEN    | ---   | ADIQDNETILEIGAGIGTLTLP | MAKK                    | - | AKKVIAIEKDP    | 73    |    |   |     |   |   |   |   |   |   |    |
| ptDim1  | 15  | LNIAKIEVNL    | ---   | LNLSPGERVLEIGPGHGILTS  | IIMEK                   | - | NVNLTVVEPDH    | 61    |    |   |     |   |   |   |   |   |   |    |
| afDim1  | 15  | RRVISRIVGY    | ---   | AELSEDDVVLEVGCGTGNL    | TSALLRK                 | - | C-SVVGIEKDP    | 60    |    |   |     |   |   |   |   |   |   |    |
| apDim1  | 40  | DRAVGEFLKPLEK | ---   | AAAEGIREALEIGPGAGSITLP | AAEV                    | - | LDRIVAVELDN    | 89    |    |   |     |   |   |   |   |   |   |    |
| ssDim1  | 3   | NGI           | ----- | -----                  | RP                      | I | LEIGCGKGNITRFL | ----- | EP | D | I   | C | I | E | L | D | D | 32 |
| paDim1  | 14  | PSVAEYIA      | ---   | GLVPSGLDVIEVGPGAGALT   | IPLAKR                  | - | SKTVYAI EIDK   | 58    |    |   |     |   |   |   |   |   |   |    |
| csDim1  | 4   | RQAARRIADS    | ---   | AGISPGD                | TVLEVGTGLGALTRELCGR     | - | GARIISVERNG    | 50    |    |   |     |   |   |   |   |   |   |    |
| seKsgA  | 15  | EAILDRIVAA    | ---   | AELRPSDRVLEIGPGRGALT   | QRLLAA                  | - | VDGLVAVELDR    | 61    |    |   |     |   |   |   |   |   |   |    |
| bKsgA   | 34  | TNILNRIVDH    | ---   | AEVTEKTGVIEIGPGIGALTE  | QLAKR                   | - | AKKVVAFEIDQ    | 80    |    |   |     |   |   |   |   |   |   |    |
| mtuKsgA | 42  | ANTVRRVVAA    | ---   | SGVSRSDLVLEVGPGGLGSL   | TLALLDR                 | - | GATVTAVEIDP    | 88    |    |   |     |   |   |   |   |   |   |    |
| ttKsgA  | 33  | EVHLRRIVEA    | ---   | ARPF                   | -TGPVFEVGPGGLGALTRALLEA | - | GAEVTAIEKDL    | 78    |    |   |     |   |   |   |   |   |   |    |
| bfKsgA  | 18  | LKVAQDIADT    | ---   | VDTFPDLPILEVGPGMGVLT   | QFLVKK                  | - | ERLVKVVEVDY    | 64    |    |   |     |   |   |   |   |   |   |    |
| ctKsgA  | 32  | GNILRKILTT    | ---   | AEVQPGDWVLEIGPGFGAL    | SEVLLSQ                 | - | GANVIALEKDP    | 78    |    |   |     |   |   |   |   |   |   |    |
| bbKsgA  | 41  | ESIRQKIIES    | ---   | LDIKENEKIWEIGPGLGAMTE  | ILLKK                   | - | TNLLTAFEIDL    | 87    |    |   |     |   |   |   |   |   |   |    |
| ecKsgA  | 23  | QFVIDSIVSA    | ---   | INPQKGQAMVEIGPGLAALTE  | EPVGER                  | - | LDQLTVIELDR    | 69    |    |   |     |   |   |   |   |   |   |    |
| cons    | 103 |               |       |                        |                         |   | * : * * . : :  |       | :  | : | 153 |   |   |   |   |   |   |    |



|         |     |       |                         |     |                          |              |     |     |     |               |     |     |
|---------|-----|-------|-------------------------|-----|--------------------------|--------------|-----|-----|-----|---------------|-----|-----|
| atDim1  | 119 | ---   | RF                      | --- | DICVANIPYQISSPLTFKLL     | FH           | --- | P   | --- | TSFRCAVIMYQ   | 154 |     |
| ddDim1  | 120 | ---   | YF                      | --- | DVCVANVPYQISSPLTFKLL     | AH           | --- | R   | --- | PIFRTAVLMFQ   | 155 |     |
| lbDim1  | 161 | ---   | YF                      | --- | DKCVANVPYAIISSALVFKLL    | KT           | --- | P   | --- | TFKCAVLMFQ    | 195 |     |
| glDim1  | 101 | ---   | PF                      | --- | DLCVSNCPYNISSGIVFRL      | EI           | --- | Q   | --- | PLPRKFVLMFQ   | 136 |     |
| pvDim1  | 170 | ---   | RF                      | --- | DICTANIPYKISSPLIFKLI     | AH           | --- | R   | --- | PLFKCAVLMFQ   | 205 |     |
| hsDim1  | 121 | ---   | FF                      | --- | DTCVANLPYQISSPFVFKLL     | LH           | --- | R   | --- | PPFRCAILMFQ   | 156 |     |
| scDim1  | 121 | ---   | YF                      | --- | DICISNTPYQISSPLVFKLI     | NQ           | --- | P   | --- | RPPRVSILMFQ   | 156 |     |
| atPFC1  | 175 | S     | AL                      | --- | AKVVSNLFPNISTDVVKLLL     | PM           | --- | G   | --- | DIFSKVLLQ     | 211 |     |
| dmTFB1  | 134 | ---   | ---                     | --- | RIHLIGNLPFAISTRLLINWL    | DDLAARRGAFRR | --- | --- | --- | IDTCMTLTFQ    | 176 |     |
| ceTFB1  | 131 | SNLPA | ---                     | --- | MHVIGNLPFNIASPLI IKYL    | RDMSYRRGVWQ  | --- | --- | --- | YGRVPLTLTFQ   | 177 |     |
| hsTFB1  | 134 | ---   | PN                      | --- | VHIIGNLPFSVSTPLI IKWL    | ENISCRDGP    | --- | --- | --- | FVYGRVPLTLTFQ | 177 |     |
| mkDim1  | 107 | ---   | DV                      | --- | NKVVANIPYNISSPITFKLL     | EL           | --- | --- | --- | DIDVAVLTYQ    | 140 |     |
| mthDim1 | 84  | ---   | EY                      | --- | NKVVSNLPHYHISTKITLRL     | RN           | --- | --- | --- | PFDLMLVLMYQ   | 117 |     |
| hwDim1  | 129 | ---   | AF                      | --- | TTCISNLPYGISSEILFELL     | PA           | --- | D   | --- | CPLIVMVQ      | 161 |     |
| mmaDim1 | 91  | ---   | PF                      | --- | EIVVANLPYSVSSKITFRL      | EI           | --- | --- | --- | GFEVAVLMYQ    | 124 |     |
| mjDim1  | 93  | L     | DF                      | --- | NKVVANLPYQISSPITFKLI     | KR           | --- | --- | --- | GFDLAVLMYQ    | 127 |     |
| phDim1  | 125 | ---   | KF                      | --- | NKVVSNIPIYKISSPFTFKLL    | KT           | --- | --- | --- | DFERAVVMYQ    | 158 |     |
| msDim1  | 105 | ---   | KF                      | --- | DKVVSNLDPYQISSPVTFKLL    | EY           | --- | P   | --- | FKKAILMYQ     | 138 |     |
| ptDim1  | 88  | ---   | AY                      | --- | DKIIGNIPYNISSQIIFKLY     | DF           | --- | D   | --- | FKLALLMVQ     | 121 |     |
| afDim1  | 93  | ---   | YF                      | --- | TKFVANIPYKISSPLTFKLL     | KT           | --- | --- | --- | DFRLAVVMYQ    | 126 |     |
| apDim1  | 118 | ---   | QA                      | --- | PLVFSNTPFNLSIPAIVEALAVN  | ---          | --- | --- | --- | NRVAAAVLGVQ   | 152 |     |
| ssDim1  | 56  | ---   | ---                     | --- | GQLVSSLPYQITSDFKKEVI     | KL           | --- | --- | --- | NNIRKLTLLQ    | 88  |     |
| paDim1  | 86  | ---   | RA                      | --- | DFVSNVPYSITSPLLFKLI      | RH           | --- | R   | --- | LPAVLTIQ      | 118 |     |
| csDim1  | 78  | ---   | GF                      | --- | DVFVSNLPYSQSRRAVEWL      | QR           | --- | D   | --- | FARGIVTVQ     | 111 |     |
| seKsgA  | 98  | ---   | RFANP                   | --- | SKVVANIPYNITGPILQSL      | GTIAQ        | --- | PRR | --- | PAFERLVLLVQ   | 141 |     |
| bKsgA   | 116 | FQ    | DC                      | --- | DEIMVVANLPYYVTTPIIMKLL   | EE           | --- | H   | --- | LPLKGIVVMLQ   | 155 |     |
| mtuKsgA | 126 | ---   | AA                      | --- | PTAVVANLPYNVAVPALLHLL    | VE           | --- | F   | --- | PSIRVVTVMVQ   | 162 |     |
| ttKsgA  | 110 | ---   | QG                      | --- | SLLVANLPYHIATPLVTRL      | KT           | --- | G   | --- | RFARLVFLVQ    | 144 |     |
| bfKsgA  | 94  | LFD   | ---                     | --- | GHPFVLGTGNYPYNISSQIFFKML | DN           | --- | K   | --- | DLIPCCTGMIQ   | 133 |     |
| ctKsgA  | 111 | ---   | GK                      | --- | GRIVANLPYHITTPLLTKFF     | LEC          | --- | P   | --- | YRWKTVTVMIQ   | 147 |     |
| bbKsgA  | 120 | ---   | NI                      | --- | DKIFSNLDPYNIASKVISKLI    | EE           | --- | --- | --- | NFLKEMVFTVQ   | 154 |     |
| ecKsgA  | 100 | LAEKM | GQPLRVFGNLPYNISTPLMFHLF | --- | ---                      | SY           | --- | T   | --- | DAIADMHFMLQ   | 141 |     |
| cons    | 205 |       |                         |     |                          |              |     |     |     |               |     | 255 |

|         |     |              |                                        |        |     |   |   |   |     |
|---------|-----|--------------|----------------------------------------|--------|-----|---|---|---|-----|
| atDim1  | 155 | REFAMRLVAQP  | -GDNLYCRLSVNTQLYARVSHLLKVGKNNFRPPPKVDS | SV     | 204 |   |   |   |     |
| ddDim1  | 156 | KEFALRLGAKP  | -GDSLVCRLSVNTQLLSKVTHLMKVGKNNFLPPP     | KVESAV | 205 |   |   |   |     |
| lbDim1  | 196 | REFALRVCAQP  | -GSEAYCRLSVNSQLLARCSHLMKISRNSFN        | NPPPKV | 245 |   |   |   |     |
| glDim1  | 137 | LEFAQRLAAEP  | -GQDQYSRLTVNTKLLSKTKIIIRVSRNS          | FKPPP  | 186 |   |   |   |     |
| pvDim1  | 206 | KEFADRMLANV  | -GDSNYSRLTVNVKLFCKVVKICNVDRSS          | FNPPP  | 255 |   |   |   |     |
| hsDim1  | 157 | REFALRLVAKP  | -GDKLYCRLSINTQLLARVDHLMKVGKNN          | FRPPP  | 206 |   |   |   |     |
| scDim1  | 157 | REFALRLLARP  | -GDSLVCRLSANVQMWANVTHIMKVGKNN          | FRPPP  | 206 |   |   |   |     |
| atPFC1  | 212 | DEAALRLVEPAL | RTSEYRPINILINFYSEPEYNFRVPREN           | FFPQP  | 262 |   |   |   |     |
| dmTFB1  | 177 | QEVAERICAPV  | -GGEQRCRLSVMSQVWTEPVMKFTIPG            | KAFV   | 226 |   |   |   |     |
| ceTFB1  | 178 | LEVAKRLCSPI  | -ACDTRSRLSISIMSQYVAEPMVFQIS            | GSCF   | 227 |   |   |   |     |
| hsTFB1  | 178 | KEVAERLAANT  | -GSKQRSRLSVMAQYLCNVRHIFTIP             | GQAF   | 227 |   |   |   |     |
| mkDim1  | 141 | REFAERMVAEP  | -GSKKYSRLTVMVNLLADVELLRGV              | PRRAF  | 190 |   |   |   |     |
| mthDim1 | 118 | REFVERMLASP  | -GSREYGRLSVNVSYADVEVLET                | VPRSA  | 167 |   |   |   |     |
| hwDim1  | 162 | REFGERMAADP  | -GTDAYGRLSVSAQHYATVEVET                | VPPTA  | 211 |   |   |   |     |
| mmaDim1 | 125 | KEFARRMVAPP  | -GTPNVGRLSVMVQTYASVKPLLE               | LPGPS  | 174 |   |   |   |     |
| mjDim1  | 128 | YEFAKRMVAKE  | -GTKDYGRLSVAVQSRADVEIVAK               | VPPSA  | 177 |   |   |   |     |
| phDim1  | 159 | LEFALRMVAKP  | -GSRNYSRLSLSMAQALGNVEIV                | MKIG   | 208 |   |   |   |     |
| msDim1  | 139 | LEFAKRMQAKP  | -DTHEYSRLSVALSYPADTKIID                | TLP    | 188 |   |   |   |     |
| ptDim1  | 122 | REFAERLVASP  | -GNKNYSRLSASSKLRFDIKK                  | VM     | 171 |   |   |   |     |
| afDim1  | 127 | REFAERLCGED  | -----NRLGVISKTYCKAEILEIV               | KPSS   | 171 |   |   |   |     |
| apDim1  | 153 | YEVARRMTARP  | -GSRDYSRLSVLVSLVFHAELAG                | VVRP   | 202 |   |   |   |     |
| ssDim1  | 89  | KDFVDKIF---  | NDSTY--ISFLLNYIYNIQIKDI                | I      | 133 |   |   |   |     |
| paDim1  | 119 | REVAERLVARP  | -GSEDYGRLTVAVQCFYDVEIL                 | RVLP   | 168 |   |   |   |     |
| csDim1  | 112 | KEFAAKLMEAD  | -P-RRRRAIGVLAGHCFEMRV                  | LFP    | 160 |   |   |   |     |
| seKsgA  | 142 | QEVADRLCATP  | -GQRAYGALSVRVQYLASC                    | ERVC   | 191 |   |   |   |     |
| bKsgA   | 156 | KEVAERMAADP  | -SSKEYGSLSIQAVQFYTEAK                  | TVMI   | 205 |   |   |   |     |
| mtuKsgA | 163 | AEVAERLAAEP  | -GSKEYGVPSVKLRFFGRV                    | RRC    | 212 |   |   |   |     |
| ttKsgA  | 145 | KEVAERMTARP  | -KTPAYGVLTLRVAHHAVA                    | ERL    | 194 |   |   |   |     |
| bfKsgA  | 134 | KEVAERIAAGP  | -GSKTYGILSVLIQAWYR                     | VEYL   | 183 |   |   |   |     |
| ctKsgA  | 148 | DEVARRITAKP  | -GDKDYGSLTVFLSFFADV                    | QYAF   | 197 |   |   |   |     |
| bbKsgA  | 155 | KELADRITAKI  | -NSKNYSSFTVLVQSHFK                     | VIK    | 204 |   |   |   |     |
| ecKsgA  | 142 | KEVVNRLVAGP  | -NSKAYGRLSVMAQYYCN                     | VIP    | 191 |   |   |   |     |
| cons    | 256 | :            | :                                      | :      | :   | * | * | : | 306 |

|         |     |                                                       |     |
|---------|-----|-------------------------------------------------------|-----|
| atDim1  | 205 | VRIEPRRP--GPO--VNKKEWDGFLRVCFIRKNKTLGSIFKQKSVLSMLEK   | 251 |
| ddDim1  | 206 | VRIEPFNP--PPP--INFVEWDGLVKLCFSRKNKTLSGIFRVSSVIETLNQ   | 252 |
| lbDim1  | 246 | IRLDPKCP--PPD--VDFEWDGLVKMLFNRRKNKASSIFRTKVAVQALYD    | 292 |
| glDim1  | 187 | VEMYVGGP--PPG--LDLDEFNGLTRILFSKKNKTLGAIFKTKSLDDLAN    | 233 |
| pvDim1  | 256 | LKLIPKEN--NFF--INFDEWDNLLRICFSRKRKTLHAIFKRNAVLMLEH    | 302 |
| hsDim1  | 207 | VRIEPKNP--PPP--INFQEWGDLVRITFVRKNKTLSAAFKSSAVQQLLEK   | 253 |
| scDim1  | 207 | VRLEIKNP--RPO--VDYNEWDGLLRIVFVRKNRTISAGFKSTTVMDILEK   | 253 |
| atPFC1  | 263 | VTFKLKHPRDYP--DVSSSTKNFFSLVNSAFNGKRKMLRKSLQHISSS----- | 307 |
| dmTFB1  | 227 | VKLIPLKRPK---TQLPFHLVERVVRHIFSMRQKYCRRGYGTLLPPEDR--   | 272 |
| ceTFB1  | 228 | VRFVPRKTPL---VNTSFEVLEKVCQVVFHYRQKYVTKGLKTLYPEELE--   | 273 |
| hsTFB1  | 228 | VHFTPLIQPK---IEQPFKLVEKVVQNVFQFRRKYCHRGLRMLFPEAQR--   | 273 |
| mkDim1  | 191 | VRLTPKSEEEERPD--VDPDTLESVCRALFQHKNKTVRNALLLSAHEWA---  | 236 |
| mthDim1 | 168 | VRLRPRRDRE--L--VDELIFSSISRDLFTKRRKKVKNALASIGVA-----   | 209 |
| hwDim1  | 212 | IRAEPDRDPDY--T--VTDETFFLRFVKAFTQRRKTVRNAIRNTAHISMLD-  | 258 |
| mmaDim1 | 175 | VRITPHEPPY--PI--ADRRVYADVVRVLFSHRRKTVRKGLRSGKDAFS---  | 219 |
| mjDim1  | 178 | VKIKPNKGY--H--IENENFFDDFLRAIFQHRNKSVRKALIDSSKELN---   | 222 |
| phDim1  | 209 | VLIEPRKDKI--V--LN----ENLVKALFQHRRKTVPRALKDSIHMLG---   | 248 |
| msDim1  | 189 | IELIPKNNKPI-----DKLLDNTIRALFQHRNKKAKKALIQSAHELG---    | 230 |
| ptDim1  | 172 | IIIKKNNK--KIP--CNP---DDIIKMAFSMKRKKISSIFKNY-----      | 207 |
| afDim1  | 172 | VRIVPEPEV--FV--ENRELFKFTFAFSMRRKRMGKIVQEFRKRYG---     | 215 |
| apDim1  | 203 | VTLRRRRRWR---SL--YARALELAGCAFTQRNKKASKVLRRCLEAAGCA-   | 247 |
| ssDim1  | 134 | TIFNRIREYD-----KEVDSILSCISRYRNKTLRKASKLCGFSSNN--      | 174 |
| paDim1  | 169 | VRLMPKAP--CVD---NFDEFKFSAWLFSARRKTLRRLKLDSTKRQVYQL    | 214 |
| csDim1  | 161 | VELAKRRT--IPG-----GVVRAVNGIFSYRRKTMRGIMKQFGREG----    | 199 |
| seKsgA  | 192 | ICLKPRPWPQ--VC--NNPGRLEKLLNQGFSAKRKMLRNNLKSLSYS-----  | 233 |
| bKsgA   | 206 | IRLILRDGPAVD--VENESFFFQLIKASFAQRRKTLNLLVNNLPEGK---    | 251 |
| mtuKsgA | 213 | VRIDRYETSPWPTDDAFRRRVFELVDIAFAQRRKTSRNAFVQWAGSG----   | 259 |
| ttKsgA  | 195 | VRLTPTGAPD-----DPGLFRLVEAAFGRRKTLNLAALAAAGYP-----     | 233 |
| bfKsgA  | 184 | IRMTRNETQE---LGCDPKLQIVKTTFNQRRKTLRNSIKPILGKDCP--     | 229 |
| ctKsgA  | 198 | VHMRVHEQFALAD--SEIEEFFTLTRAAFQRRKLLANSLKNLYP-----     | 240 |
| bbKsgA  | 205 | LKLIPKKN-----IKNFKEFNKLVRTVFSNRRKLLKNTIINFITNK----    | 246 |
| ecKsgA  | 192 | VRLVPHATMPHPV--KDVRVLSRITTEAFNQRRKTIRNSLGNLFSVEVLTG   | 240 |
| cons    | 307 | .....:..:.....                                        | 357 |





|         |     |                     |                           |       |            |      |     |
|---------|-----|---------------------|---------------------------|-------|------------|------|-----|
| atDim1  | 289 | DNEMDDDDMEMDEGEGDGG | ETSEFKEKVMNVLKEGG         | ----- | FEEK       | RS   | 330 |
| ddDim1  | 269 | -----               | SDEQMKELI IKTLTDND        | ----- | FLDS       | RS   | 291 |
| lbDim1  | 322 | -----               | SLEQFRVLLDSVIADPM         | ----- | F-ET       | RS   | 343 |
| glDim1  | 270 | -----               | TGVQLRERIAEALAEAN         | ----- | LTDT       | RP   | 292 |
| pvDim1  | 319 | -----               | PFKKYCLDTLKELD            | ----- | MTEC       | RS   | 338 |
| hsDim1  | 269 | -----               | DFS IADKIQQILTSTG         | ----- | FSDK       | RA   | 290 |
| scDim1  | 273 | -----               | MHDVVKEKIDTVLKETD         | ----- | LGDK       | RA   | 295 |
| atPFC1  | 308 | -----               | PDIEKALGVAG               | ----- | LPATSRP    |      | 325 |
| dmTFB1  | 273 | -----               | EEVAEKLFQRAE              | ----- | VQDTLRP    |      | 291 |
| ceTFB1  | 274 | -----               | DELSDDLKCR                | ----- | IDPTTTS    |      | 292 |
| hsTFB1  | 274 | -----               | LESTGRLLELAD              | ----- | IDPTLRP    |      | 292 |
| mkDim1  | 237 | -----               | TDREQAREVLEELPE           | ----- | DLLS       | ERP  | 258 |
| mthDim1 | 210 | -----               | DDVMLDLDP                 | ----- | ILD        | ARP  | 225 |
| hwDim1  | 259 | -----               | TPDAVNAADE                | ----- | ALLS       | QRA  | 276 |
| mmaDim1 | 220 | -----               | PEAIGRTIASLPD             | ----- | DLLQ       | RRP  | 239 |
| mjDim1  | 223 | -----               | YNKDEMKKILEDFLNTNSEIKNLIN | ----- | EKV        |      | 250 |
| phDim1  | 249 | -----               | VSKDEIRGIINNV             | ----- | HSNK       | RV   | 268 |
| msDim1  | 231 | -----               | VDKKVLKQKLSNVTN           | ----- | DLFE       | EKV  | 252 |
| ptDim1  | 208 | -----               | DGP                       | ----- | LKY        | KRP  | 216 |
| afDim1  | 219 | -----               |                           | ----- | AVNKNLAE   | KRP  | 229 |
| apDim1  | 248 | -----               |                           | ----- | PPPWLDSLGD | ARV  | 260 |
| ssDim1  | 175 | -----               |                           | ----- | DLKV       |      | 178 |
| paDim1  | 219 | -----               |                           | ----- |            |      | 218 |
| csDim1  | 200 | -----               |                           | ----- | GPGRL      |      | 204 |
| seKsgA  | 234 | -----               | SEQIEAAFAAHQ              | ----- | IAP        | EARA | 252 |
| bKsgA   | 252 | -----               | AQKSTIEQVLEETN            | ----- | IDGKRRG    |      | 272 |
| mtuKsgA | 260 | -----               | SESANRLLAAS               | ----- | IDPARRG    |      | 277 |
| ttKsgA  | 234 | -----               | KARVEEALRALG              | ----- | LPPRVRA    |      | 252 |
| bfKsgA  | 230 | -----               |                           | ----- | LTEDALFN   | KRP  | 240 |
| ctKsgA  | 241 | -----               | KDKVQVLEQLG               | ----- | FSEKTRP    |      | 259 |
| bbKsgA  | 247 | -----               | ATLRENFL                  | ----- | KEYLD      | KRP  | 262 |
| ecKsgA  | 241 | -----               | MG                        | ----- | IDP        | AMRA | 249 |
| cons    | 409 |                     |                           |       |            |      | 459 |

|         |     |                                                                  |     |
|---------|-----|------------------------------------------------------------------|-----|
| atDim1  | 331 | SKLSQQEFLYLLSFLNKS <del>GIHF</del> -----                         | 352 |
| ddDim1  | 292 | SKLDINDFLKLLNKFHET <del>GIHF</del> -----                         | 313 |
| lbDim1  | 344 | RMLDEEALMTMLA <del>HFIKHGIHF</del> -----                         | 365 |
| glDim1  | 293 | NHMAIPDLLSLMCALAAK <del>GVRFT</del> -----                        | 315 |
| pvDim1  | 339 | VSLDENDFLKLLLKFNKK <del>GIHF</del> FNISNVGSSRAANIVLNE--EGDVRGDGG | 387 |
| hsDim1  | 291 | RSMDIDDFIRLLHGFNAE <del>GIHF</del> -----                         | 312 |
| scDim1  | 296 | GKCDQNDFLRLLYAFHQV <del>GIHF</del> -----                         | 317 |
| atPFC1  | 326 | EELTLDDFVKLHNVIARE-----                                          | 343 |
| dmTFB1  | 292 | FELTVEQCLRLAEVYSEH <del>LVTRPEVAAYDYR</del> -----                | 322 |
| ceTFB1  | 293 | IRLGIEQFADLAEGYNE <del>QCIRYPGLFLYDYTNKLHNLEDLS</del> KEPNALPPP  | 343 |
| hsTFB1  | 293 | RQLSISHFKSLCDVYR <del>KMCDEDPQLFAYN</del> FREELKRRKSK-----       | 332 |
| mkDim1  | 259 | LHLPPERVAELAAAI <del>ESAL</del> -----                            | 277 |
| mthDim1 | 226 | EDLGVDEFVQIARV <del>VSEHRSRDS</del> -----                        | 248 |
| hwDim1  | 277 | GDLTPEFAELATIAA <del>EKG</del> -----                             | 295 |
| mmaDim1 | 240 | EDLTLEEFALIAN <del>KMSGG</del> -----                             | 257 |
| mjDim1  | 251 | FKLSVKDIVNLSNEFY <del>RFLQNR</del> -----GR-----                  | 274 |
| phDim1  | 269 | FQLYPEEVKDIEEYL <del>KKHGI</del> I-----                          | 289 |
| msDim1  | 253 | FKLTPTQIKEISLILE <del>GN</del> -----                             | 270 |
| ptDim1  | 217 | GDLSPEDFIDLCCYL <del>FPERCQG</del> -----                         | 238 |
| afDim1  | 230 | EELGARKFAEIVV <del>G</del> -----                                 | 243 |
| apDim1  | 261 | WMLRPEDFVGLAEAC <del>RG</del> -----                              | 277 |
| ssDim1  | 179 | REFKPWQVLELLNS <del>VG</del> -----                               | 194 |
| paDim1  | 219 | -----LVELFKR--HK-----                                            | 227 |
| csDim1  | 205 | DDLSGDEIVGVAAE <del>IA</del> -----                               | 220 |
| seKsgA  | 253 | ETLSIDQWIGLCTDL <del>GDP</del> TDSAI-----                        | 275 |
| bKsgA   | 273 | ESLSIEEFAALSNG <del>LYKAL</del> -----                            | 291 |
| mtuKsgA | 278 | ETLSIDDFVRLRR <del>SGG</del> -----                               | 294 |
| ttKsgA  | 253 | EELDLEAFRRRLRE <del>GLEGA</del> -----                            | 270 |
| bfKsgA  | 241 | EQLSVQEFIH <del>LTNQVEQAL</del> -----KVPIEPV-----                | 266 |
| ctKsgA  | 260 | ETIFLEEYLKIFH <del>LKDI</del> -----                              | 277 |
| bbKsgA  | 263 | ENISVEEFIQISN <del>TLNAYH</del> -----                            | 281 |
| ecKsgA  | 250 | ENISVAQYCYMAN <del>YLAENAPLQE</del> -----                        | 272 |
| cons    | 460 | -----:-----                                                      | 510 |

|         |     |                                |     |
|---------|-----|--------------------------------|-----|
| atDim1  | 353 | -----T                         | 353 |
| ddDim1  | 314 | -----K                         | 314 |
| lbDim1  | 366 | -----I                         | 366 |
| glDim1  | 316 | -----N                         | 316 |
| pvDim1  | 388 | VGGAGGAGSDSSDDSDSDGYDDVDSIHEKV | 417 |
| hsDim1  | 313 | -----S                         | 313 |
| scDim1  | 318 | -----S                         | 318 |
| atPFC1  | 344 | -----                          | 343 |
| dmTFB1  | 323 | -----APKNVEVL                  | 330 |
| ceTFB1  | 344 | PIFAPAPTIDSADNTW-----SLKNFNCS  | 367 |
| hsTFB1  | 333 | -----NEEKEDD-AENYRL            | 346 |
| mkDim1  | 278 | -----G                         | 278 |
| mthDim1 | 249 | -----L                         | 249 |
| hwDim1  | 296 | -----K                         | 296 |
| mmaDim1 | 258 | -----                          | 257 |
| mjDim1  | 275 | -----L                         | 275 |
| phDim1  | 290 | -----S                         | 290 |
| msDim1  | 271 | -----L                         | 271 |
| ptDim1  | 239 | -----S                         | 239 |
| afDim1  | 244 | -----E                         | 244 |
| apDim1  | 278 | -----                          | 277 |
| ssDim1  | 195 | -----                          | 194 |
| paDim1  | 228 | -----A                         | 228 |
| csDim1  | 221 | -----R                         | 221 |
| seKsgA  | 276 | -----NPTA                      | 279 |
| bKsgA   | 292 | -----F                         | 292 |
| mtuKsgA | 295 | SDEATSTGRDARAP-----DISGHASAS   | 317 |
| ttKsgA  | 271 | -----V                         | 271 |
| bfKsgA  | 267 | -----SQIENP                    | 272 |
| ctKsgA  | 278 | -----                          | 277 |
| bbKsgA  | 282 | -----                          | 281 |
| ecKsgA  | 273 | -----S                         | 273 |
| cons    | 511 | -----                          | 540 |
