# Supplementary material for: Sequence and structural evolution of the KsgA/Dim1 methyltransferase family
Source: PubMed Central journal article supplement (PMC2614427; doi:10.1186/1756-0500-1-108), 2008-10-29
Supplement: 1756-0500-1-108-S2.pdf [file 1756-0500-1-108-S2.pdf]

T-COFFEE, Version\_5.31Fri Oct 26 17:01:36 2007

Cedric Notredame

CPU TIME:67 sec.

SCORE=27

\*

BAD AVG GOOD

\*

|         |   |    |
|---------|---|----|
| ceTFB1  | : | 33 |
| hsTFB1  | : | 33 |
| dmTFB1  | : | 29 |
| agTFB1  | : | 33 |
| amTFB1  | : | 33 |
| xlTFB1  | : | 33 |
| trTFB1  | : | 34 |
| ciTFB1  | : | 31 |
| hsTFB2  | : | 30 |
| rnTFB2  | : | 29 |
| dmTFB2  | : | 19 |
| ptTFB2  | : | 31 |
| mmuTFB2 | : | 29 |
| btTFB2  | : | 29 |
| trTFB2  | : | 28 |
| tnTFB2  | : | 27 |
| scTFB   | : | 18 |
| spTFB   | : | 19 |
| klTFB   | : | 15 |
| egTFB   | : | 19 |
| caTFB   | : | 19 |
| ddTFB   | : | 31 |
| tbTFB   | : | 27 |
| lmTFB   | : | 27 |
| cons    | : | 27 |

|         |   |                                                                     |    |
|---------|---|---------------------------------------------------------------------|----|
| ceTFB1  | 1 | -----                                                               | 0  |
| hsTFB1  | 1 | -----                                                               | 0  |
| dmTFB1  | 1 | <b>MALVTTLSLEESLNSRICVRS</b> SENGARSGIAENAVF <b>PLSSNYALCNAITEK</b> | 51 |
| agTFB1  | 1 | -----                                                               | 0  |
| amTFB1  | 1 | -----                                                               | 0  |
| xlTFB1  | 1 | -----                                                               | 0  |
| trTFB1  | 1 | -----                                                               | 0  |
| ciTFB1  | 1 | ----- <b>MKISHRLL</b> -----                                         | 8  |
| hsTFB2  | 1 | -----                                                               | 0  |
| rnTFB2  | 1 | -----                                                               | 0  |
| dmTFB2  | 1 | -----                                                               | 0  |
| ptTFB2  | 1 | -----                                                               | 0  |
| mmuTFB2 | 1 | -----                                                               | 0  |
| btTFB2  | 1 | -----                                                               | 0  |
| trTFB2  | 1 | -----                                                               | 0  |
| tnTFB2  | 1 | ----- <b>MYRKGFKWSSCPRC</b> ----- <b>PFILYTLQLQTSIMST</b> -----     | 29 |
| scTFB   | 1 | -----                                                               | 0  |
| spTFB   | 1 | -----                                                               | 0  |
| klTFB   | 1 | -----                                                               | 0  |
| egTFB   | 1 | -----                                                               | 0  |
| caTFB   | 1 | <b>MRILTKAR</b> ----- <b>AFNPHLA</b> -----                          | 15 |
| ddTFB   | 1 | -----                                                               | 0  |
| tbTFB   | 1 | ----- <b>MSRRFLNRSQ</b> -----                                       | 10 |
| lmTFB   | 1 | -----                                                               | 0  |
| cons    | 1 | <b>-----</b> ----- <b>-----</b>                                     | 51 |

|         |    |                                                                      |     |
|---------|----|----------------------------------------------------------------------|-----|
| ceTFB1  | 1  | -----                                                                | 0   |
| hsTFB1  | 1  | -----                                                                | 0   |
| dmTFB1  | 52 | <b>LLWLTCRQVVAHCAWK</b> <b>SALRCRTSRRTRATN</b> ENFIILKSARKARKKGRLLAA | 102 |
| agTFB1  | 1  | -----                                                                | 0   |
| amTFB1  | 1  | -----                                                                | 0   |
| xlTFB1  | 1  | -----                                                                | 0   |
| trTFB1  | 1  | -----                                                                | 0   |
| ciTFB1  | 9  | <b>NK</b> -----                                                      | 10  |
| hsTFB2  | 1  | -----                                                                | 0   |
| rnTFB2  | 1  | -----                                                                | 0   |
| dmTFB2  | 1  | -----                                                                | 0   |
| ptTFB2  | 1  | -----                                                                | 0   |
| mmuTFB2 | 1  | -----                                                                | 0   |
| btTFB2  | 1  | -----                                                                | 0   |
| trTFB2  | 1  | -----                                                                | 0   |
| tnTFB2  | 30 | <b>KMCMVVELMRSACC</b> ----- <b>HTVRSRSLRRPTML</b> -----              | 58  |
| scTFB   | 1  | -----                                                                | 0   |
| spTFB   | 1  | -----                                                                | 0   |
| klTFB   | 1  | -----                                                                | 0   |
| egTFB   | 1  | -----                                                                | 0   |
| caTFB   | 16 | -----                                                                | 15  |
| ddTFB   | 1  | -----                                                                | 0   |
| tbTFB   | 11 | ----- <b>VTSASA</b> ----- <b>ALLYSRRGVSKPSTD</b> -----               | 31  |
| lmTFB   | 1  | ----- <b>MHGASGSLLPQA</b> -----                                      | 13  |
| cons    | 52 | <b>-----</b> ----- <b>-----</b>                                      | 102 |

|         |     |                                                         |     |
|---------|-----|---------------------------------------------------------|-----|
| ceTFB1  | 1   | -----                                                   | 0   |
| hsTFB1  | 1   | -----                                                   | 0   |
| dmTFB1  | 103 | FI MSASEQGPKI -- KYGESAPKLDKAQLQFMKLIIEEQNLDRVQKLKRIRRN | 151 |
| agTFB1  | 1   | -- MSASEGPSKVEFKIEESGRKLLKKAEVDFMRLIEQQNLQRVQKLQRQRN    | 49  |
| amTFB1  | 1   | -----                                                   | 0   |
| xlTFB1  | 1   | -----                                                   | 0   |
| trTFB1  | 1   | -----                                                   | 0   |
| ciTFB1  | 11  | -----                                                   | 10  |
| hsTFB2  | 1   | -----                                                   | 0   |
| rnTFB2  | 1   | -----                                                   | 0   |
| dmTFB2  | 1   | -----                                                   | 0   |
| ptTFB2  | 1   | -----                                                   | 0   |
| mmuTFB2 | 1   | -----                                                   | 0   |
| btTFB2  | 1   | -----                                                   | 0   |
| trTFB2  | 1   | -----                                                   | 0   |
| tnTFB2  | 59  | -----                                                   | 58  |
| scTFB   | 1   | -----                                                   | 0   |
| spTFB   | 1   | -----                                                   | 0   |
| klTFB   | 1   | -----                                                   | 0   |
| egTFB   | 1   | -----                                                   | 0   |
| caTFB   | 16  | -----                                                   | 15  |
| ddTFB   | 1   | -----                                                   | 0   |
| tbTFB   | 32  | -----                                                   | 31  |
| lmTFB   | 14  | -----                                                   | 13  |

cons 103  153

|         |     |                                                                    |          |         |    |
|---------|-----|--------------------------------------------------------------------|----------|---------|----|
| ceTFB1  | 1   | -----                                                              | MASAS    | 5       |    |
| hsTFB1  | 1   | -----                                                              | MAA      | SGKLSTC | 10 |
| dmTFB1  | 152 | NLLTAGALGVSVLAIYGY SIFSVQQEKFLDD FE E P K K M A Q P S A            | RVLQSGM  | 201     |    |
| agTFB1  | 50  | NKLTGIALGGTVLGIYLY SMLS VK Q E K F L D D F E E P M S A S T K I S K | KALTSTGI | 100     |    |
| amTFB1  | 1   | -----                                                              | MSTI     | 4       |    |
| xlTFB1  | 1   | -----                                                              | MAT      | PGALAKF | 10 |
| trTFB1  | 1   | -----                                                              | MSA      | SQKLASL | 10 |
| ciTFB1  | 11  | -----                                                              | FRPKLQL  | NHDLPTQ | 24 |
| hsTFB2  | 1   | -----                                                              | -----    | MWIPVV  | 6  |
| rnTFB2  | 1   | -----                                                              | -----    | MRGLAM  | 6  |
| dmTFB2  | 1   | -----                                                              | -----    | -----   | 0  |
| ptTFB2  | 1   | -----                                                              | -----    | MWIPVV  | 6  |
| mmuTFB2 | 1   | -----                                                              | -----    | MRGPAM  | 6  |
| btTFB2  | 1   | -----                                                              | -----    | MWVPGA  | 6  |
| trTFB2  | 1   | -----                                                              | -----    | -----   | 0  |
| tnTFB2  | 59  | -----                                                              | SMA      | PSCLSAV | 68 |
| scTFB   | 1   | -----                                                              | -----    | -----   | 0  |
| spTFB   | 1   | -----                                                              | -----    | M       | 1  |
| klTFB   | 1   | -----                                                              | -----    | MTK     | 3  |
| egTFB   | 1   | -----                                                              | -----    | -----   | 0  |
| caTFB   | 16  | -----                                                              | -----    | -----   | 15 |
| ddTFB   | 1   | -----                                                              | M        | TIKNLTT | 8  |
| tbTFB   | 32  | -----                                                              | AA       | APPLPPL | 40 |
| lmTFB   | 14  | -----                                                              | AA       | PVALPPL | 22 |

cons 154  204

|         |     |         |       |                    |             |            |             |             |              |               |    |
|---------|-----|---------|-------|--------------------|-------------|------------|-------------|-------------|--------------|---------------|----|
| ceTFB1  | 6   | RLPP    | ---   | LPALRDFI           | -----       | -----      | -----       | 17          |              |               |    |
| hsTFB1  | 11  | RLPP    | ---   | LPTIREII           | -----       | -----      | -----       | 22          |              |               |    |
| dmTFB1  | 202 | RLPP    | ---   | MPTIRELV           | -----       | -----      | -----       | 213         |              |               |    |
| agTFB1  | 101 | RLPP    | ---   | LPTIRDLV           | -----       | -----      | -----       | 112         |              |               |    |
| amTFB1  | 5   | RLPP    | ---   | LPSIKDVL           | -----       | -----      | -----       | 16          |              |               |    |
| xlTFB1  | 11  | RLPP    | ---   | LPTIGEIV           | -----       | -----      | -----       | 22          |              |               |    |
| trTFB1  | 11  | RLPP    | ---   | LPTVGELI           | -----       | -----      | -----       | 22          |              |               |    |
| ciTFB1  | 25  | AIPP    | ---   | MPTSSELL           | -----       | -----      | -----       | 36          |              |               |    |
| hsTFB2  | 7   | GLPR    | ---   | RLRLSALAGAGRFCILG  | -----       | SEAA       | TRKHLPARNHC | 42          |              |               |    |
| rnTFB2  | 7   | RLPP    | ---   | RLALSVL            | LAGRGPSCILG | -----      | SGAA        | TRKDWQERNRR | 42           |               |    |
| dmTFB2  | 1   | MLPL    | ---   | RCSWS              | ---         | FAR        | ---         | ANY         | STKKELVTRYSG | 27            |    |
| ptTFB2  | 7   | GLPR    | ---   | RLRLSALAGAGRFCILG  | -----       | SEAA       | TRKHLPARNHC | 42          |              |               |    |
| mmuTFB2 | 7   | RLPP    | ---   | RIALSALA           | ---         | RG         | PSCILG      | ---         | SGAA         | TRKDWQTRNRR   | 41 |
| btTFB2  | 7   | GIPS    | ---   | RLTLSAFT           | ---         | RAARF      | CVLN        | ---         | SG           | VARWKDVPAENCR | 42 |
| trTFB2  | 1   | -----   | ----- | -----              | -----       | -----      | -----       | -----       | -----        | 0             |    |
| tnTFB2  | 69  | GLPGVHR | ---   | RAYSLDPLSSGSGRTTLG | ---         | SFTPPHSAER | ---         | SSP         | SSPSSALTHRNL | 119           |    |
| scTFB   | 1   | MSVP    | ---   | IPGIKD             | IS          | -----      | -----       | -----       | -----        | 12            |    |
| spTFB   | 2   | KLPK    | ---   | ILYDAAAF           | G           | ---        | ---         | GPR         | STGFV        | 22            |    |
| klTFB   | 4   | SSFL    | ---   | KSVLPLAN           | ---         | -----      | -----       | -----       | -----        | 15            |    |
| egTFB   | 1   | -----   | ----- | ---                | MSSASKF     | ---        | ---         | SKQ         | SFLEACL      | 17            |    |
| caTFB   | 16  | -----   | ----- | -----              | -----       | -----      | -----       | -----       | -----        | 15            |    |
| ddTFB   | 9   | SLPP    | ---   | MPKIQEII           | ---         | -----      | -----       | -----       | -----        | 20            |    |
| tbTFB   | 41  | RCPGGPR | ---   | -----              | -----       | ---        | ---         | VKA         | EGLKQLF      | 57            |    |
| lmTFB   | 23  | RCPGGPR | ---   | -----              | -----       | ---        | ---         | VKA         | EGIKQLY      | 39            |    |
| cons    | 205 | -----   | ---   | -----              | ---         | -----      | ---         | -----       | ---          | 255           |    |

|         |     |                  |     |                 |            |                 |     |         |             |                |     |
|---------|-----|------------------|-----|-----------------|------------|-----------------|-----|---------|-------------|----------------|-----|
| ceTFB1  | 18  | -----            | --- | HMYRLRAKKIL     | -----      | ---             | --- | SON     | YLMDMNITRKI | 42             |     |
| hsTFB1  | 23  | -----            | --- | KLLRLQAANEL     | -----      | ---             | --- | SON     | FLLDLRLTDKI | 47             |     |
| dmTFB1  | 214 | -----            | --- | KLYRLQARKQL     | -----      | ---             | --- | SON     | FLMDERLTDKI | 238            |     |
| agTFB1  | 113 | -----            | --- | KLYQLRAIKQL     | -----      | ---             | --- | SON     | FLMDERLTDKI | 137            |     |
| amTFB1  | 17  | -----            | --- | KIYRLRAMKEL     | -----      | ---             | --- | SON     | FILNQNLADKI | 41             |     |
| xlTFB1  | 23  | -----            | --- | KLFNLRAEKQL     | -----      | ---             | --- | SON     | FLLDLKLTDKI | 47             |     |
| trTFB1  | 23  | -----            | --- | KLYNLRAEKQL     | -----      | ---             | --- | SON     | FLLDLKLTDKI | 47             |     |
| ciTFB1  | 37  | -----            | --- | KMYNVRARKQL     | -----      | ---             | --- | SON     | FLLDPLITNRF | 61             |     |
| hsTFB2  | 43  | GLSDSSPQLWPEPDF  | --- | RNPPRKASKAS     | ---        | LDFKRYVTDRR     | --- | ---     | ---         | LAETL          | 84  |
| rnTFB2  | 43  | SFSDLYTQPLPDCDFE | --- | EESSSWTHKSR     | ---        | SEPTRHIACKK     | --- | ---     | ---         | SARNLV         | 85  |
| dmTFB2  | 28  | DFPE             | --- | ---             | KLLNRKQKVP | ---             | --- | ---     | ---         | THMYIANSEAAARI | 55  |
| ptTFB2  | 43  | GLSDSSPQLWPEPDF  | --- | RNPP            | ---        | RKASLDFKRYVTDRR | --- | ---     | ---         | LAETL          | 81  |
| mmuTFB2 | 42  | GFSDFNIEPLPDS    | --- | LDLEESSPWTS     | ---        | SRNRSEPTRHIACKK | --- | ---     | ---         | AARNLV         | 84  |
| btTFB2  | 43  | GLYDFHTQLKPDVEF  | --- | GKLSRRLYKSRSE   | ---        | ---             | --- | ---     | ---         | TKRYVTSPRVAETV | 84  |
| trTFB2  | 1   | -----            | --- | -----           | ---        | ---             | --- | ---     | ---         | MRHFIVNPDLAKLI | 14  |
| tnTFB2  | 120 | AVAVQGQRRLCRYD   | --- | FLDLGE          | ---        | VEENV           | --- | RAQACKK | ---         | IRHFIVDPDLAKLV | 166 |
| scTFB   | 13  | -----            | --- | KLKFFYGFKYL     | ---        | WNPT            | --- | ---     | ---         | VYNKI          | 32  |
| spTFB   | 23  | -----            | --- | KILNLNGRSSY     | ---        | ---             | --- | ---     | ---         | KSSYLVNQNLMD   | 47  |
| klTFB   | 16  | -----            | --- | KIHTSYGSQFEKNPK | ---        | ---             | --- | ---     | ---         | VINQI          | 35  |
| egTFB   | 18  | -----            | --- | AVKFSYGR        | ---        | LLHSPT          | --- | ---     | ---         | AIELA          | 37  |
| caTFB   | 16  | -----            | --- | EMFSNKIPYYY     | ---        | ---             | --- | ---     | ---         | SRAHMADPEACQKI | 40  |
| ddTFB   | 21  | -----            | --- | RIFGLSAKQQL     | ---        | ---             | --- | ---     | ---         | SONFLIDKNITDKI | 45  |
| tbTFB   | 58  | -----            | --- | KVPHAGYLAKY     | ---        | ---             | --- | ---     | ---         | GQRFILNLKLTHQV | 82  |
| lmTFB   | 40  | -----            | --- | KVPHAGFLAKY     | ---        | ---             | --- | ---     | ---         | DQRFMLNLKLTHQL | 64  |
| cons    | 256 | -----            | --- | -----           | ---        | -----           | --- | -----   | ---         | 306            |     |

|         |     |                                                        |     |
|---------|-----|--------------------------------------------------------|-----|
| ceTFB1  | 43  | AK-HA-----KVIEKDWVIEIGPGGGITRAILEAG--ASRLDVVEIDNR      | 84  |
| hsTFB1  | 48  | VR-KA-----GNLTNAYVYEVGPGGGITRSILNAD--VAELLVVEKDTR      | 89  |
| dmTFB1  | 239 | VK-SA-----GRIDPRDLVLEVGPGGGITRSILRRH--PQRLLLVEKDPR     | 281 |
| agTFB1  | 138 | VR-AA-----GNIRDHYVLEVGPGGGITRSIIRQN--PRHLVVVEKDRR      | 179 |
| amTFB1  | 42  | IK-KT-----GNLNDCHVLEIGPGGALTRSILKCQ--PKKLIVVEKDKR      | 83  |
| xlTFB1  | 48  | VR-RA-----GNLQNAVCEVGPGGGITRSILNAG--VEELLVVEKDTR       | 89  |
| trTFB1  | 48  | VR-QA-----GCLKDAHVCEVGPGGGLTRSILNAG--AADLLVVEKDSR      | 89  |
| ciTFB1  | 62  | VLCGA-----KDLAGHHVCEVGPGGPITRSILQRK--PERLTVVEKDHR      | 104 |
| hsTFB2  | 85  | AQ---IYLGKP--SRPPHLLLECNPGPGILTQALLEAGA---KVVVALESDKT  | 128 |
| rnTFB2  | 86  | R---DLLEHQ--NPSHQLILECNPGPGILTGALLKAGA---RVVAFESEKM    | 128 |
| dmTFB2  | 56  | NQ-Y--LEPHFQS--SGCDTVMELNSGAGYFTRHLLDRESQFRRIILLESMDH  | 103 |
| ptTFB2  | 82  | AQ---IYLGKP--SRPPHLLLECNPGPGILTQALLEAGA---KVVVALESDKT  | 125 |
| mmuTFB2 | 85  | R---DLLEHQ--NPSRQIILECNPGPGILTGALLKAGA---RVVAFESEKT    | 127 |
| btTFB2  | 85  | VR---VLRGK--RKAGQLILECNPGPGVLTTRALLESGA---RVIALESDKN   | 127 |
| trTFB2  | 15  | T---QHLLP--ENAATIIFECNPGPGVLTTRTLLNSGV---QKVVVALEGDKV  | 57  |
| tnTFB2  | 167 | T---QHLOP--DNATTIIFDCNPGPGVLTTRTLLNSGI---QKVVVALEGEKF  | 209 |
| scTFB   | 33  | FD-KLDLTKTYKHPEELKVLDLYPGVGIQSAIFYNKYC-----PRQYS       | 74  |
| spTFB   | 48  | LV-KSNLLKEY--NSEKMTILEMAPGPGVTTTSLFNIFYQ--PKSHVVLESREV | 95  |
| klTFB   | 36  | LD-KLNLESYY--KESLQILDIYAGPLIQSVILNERLK-----PKKHV       | 76  |
| egTFB   | 38  | YK-RLNLQEHY--DMSKVQVLELYPGTGLPSYIFHDI-----             | 71  |
| caTFB   | 41  | LD-KLDLKSXY--DGSKLDIVDVNPGYGLFSTML--NYELKPRNHILIENTKER | 88  |
| ddTFB   | 46  | CK-KS-----GGFDDCTVIEVGAGPGGLTRSLLTSG--AKKVIAVEMDPR     | 87  |
| tbTFB   | 83  | AA-LLSRTT--L RTPDKLLELGPAGALTRSLLTRP--CVGVVLGIEQDER    | 128 |
| lmTFB   | 65  | VS-YLSRTT--L TTPDKVLVELGPGVGSLTRSLLTRP--CVGVVLGIEVDER  | 110 |

cons 307 : : . \* : : 357

|         |     |                                                   |     |
|---------|-----|---------------------------------------------------|-----|
| ceTFB1  | 85  | FIPPLQHLAE--AADS--RMFIHHQDA-----LRTEIGDIWKN---    | 118 |
| hsTFB1  | 90  | FIPGLQMLSD--AAPG--KLRIVHGDV-----LTFKVE-----       | 118 |
| dmTFB1  | 282 | FGETLQQLKE--CASPLNIQFDIHYDDI-----LRFN-----        | 311 |
| agTFB1  | 180 | FMPTMEMLAEV--AQPFM--RMDIVQGDI-----LDYRVA-----     | 210 |
| amTFB1  | 84  | FEPTLEMLADAFETING--KMEIIFDDI-----MKINMS-----      | 115 |
| xlTFB1  | 90  | FIPGLKMLNE--ASGG--KVRTVHGDV-----LTYRMD-----       | 118 |
| trTFB1  | 90  | FIPGLKLLSE--AAPG--RVRIVHGDV-----LTYRMD-----       | 118 |
| ciTFB1  | 105 | FLPMLKYVAD--VSND--RMTIVHGDV-----LKYDLS-----       | 133 |
| hsTFB2  | 129 | FIPHLES LGK--NLDG--KLRVIHCDF-----FKLDPRS-----     | 158 |
| rnTFB2  | 129 | FIPHLES LRK--NADG--ELQVVHCDF-----FKIDPRY-----     | 158 |
| dmTFB2  | 104 | FMPKIQELHT--LYPE--RVKVRQGDF-----VNLWKLVMYMDKMDG   | 140 |
| ptTFB2  | 126 | FIPHLES LGK--NLDG--KLRVIHCDF-----FKLDPRS-----     | 155 |
| mmuTFB2 | 128 | FIPHLEPLQR--NMDG--ELQVVHCDF-----FKMDPRY-----      | 157 |
| btTFB2  | 128 | FIPELKSLGN--SVNG--RLEVIYCDF-----FKLDPRN-----      | 157 |
| trTFB2  | 58  | FLSELQALEV--QLDG--QLEVVNCDF-----FKLDPIG-----      | 87  |
| tnTFB2  | 210 | FLPELQDLEI--QLDG--QLEVVHCDF-----FKLDPIG-----      | 239 |
| scTFB   | 75  | LLEKRSSLYK--FLNA--KFEGSPLQI-----LKRDPYD-----      | 104 |
| spTFB   | 96  | FSKPLQKLCT--LSDG--RIKWVHQDG-----YYW-----          | 121 |
| klTFB   | 77  | LLEDRLKFVE--LYQA--TLKDHPSMV-----N--YNKNPYK-----   | 107 |
| egTFB   | 72  | YKPKLQVLM E--SKPA--YAKVIEQHLLLDN I KLHKEDPYM----- | 109 |
| caTFB   | 89  | CVTSLSSIIN--KLVE--ETGH-----NSNFTLYKKDSFI-----     | 119 |
| ddTFB   | 88  | FYPALKMLEE--SSGG--RMSLIMANM-----MDVDEA-----       | 116 |
| tbTFB   | 129 | FNGHLEQIRQ--YTSG--KFQWTNGDV-----LRINELEIVEESLYA   | 165 |
| lmTFB   | 111 | FNPHEQIRN--YTNN--KFQWVTADV-----LKVDELELELLKSAFP   | 147 |

cons 358 . 408

|         |     |                       |                  |         |        |     |
|---------|-----|-----------------------|------------------|---------|--------|-----|
| ceTFB1  | 119 | -----                 | -----            | 118     |        |     |
| hsTFB1  | 119 | -----                 | -----            | 118     |        |     |
| dmTFB1  | 312 | -----                 | -----            | 311     |        |     |
| agTFB1  | 211 | -----                 | -----            | 210     |        |     |
| amTFB1  | 116 | -----                 | -----            | 115     |        |     |
| xlTFB1  | 119 | -----                 | -----            | 118     |        |     |
| trTFB1  | 119 | -----                 | -----            | 118     |        |     |
| ciTFB1  | 134 | -----                 | -----            | 133     |        |     |
| hsTFB2  | 159 | -----                 | -----            | 158     |        |     |
| rnTFB2  | 159 | -----                 | -----            | 158     |        |     |
| dmTFB2  | 141 | -----                 | -----            | 140     |        |     |
| ptTFB2  | 156 | -----                 | -----            | 155     |        |     |
| mmuTFB2 | 158 | -----                 | -----            | 157     |        |     |
| btTFB2  | 158 | -----                 | -----            | 157     |        |     |
| trTFB2  | 88  | -----                 | -----            | 87      |        |     |
| tnTFB2  | 240 | -----                 | -----            | 239     |        |     |
| scTFB   | 105 | -----                 | -----            | 104     |        |     |
| spTFB   | 122 | -----                 | -----            | 121     |        |     |
| klTFB   | 108 | -----                 | -----            | 107     |        |     |
| egTFB   | 110 | -----                 | -----            | 109     |        |     |
| caTFB   | 120 | -----                 | -----            | 119     |        |     |
| ddTFB   | 117 | -----                 | -----            | 116     |        |     |
| tbTFB   | 166 | GFAQQHRRKPAADARERASSD | GNKSDGGEACSSG    | TKDSGCC | TDDFYC | 212 |
| lmTFB   | 148 | HFVKANIRRPPSPGQETWAAN | SAADPAASSGSQRVTF | TDDAGEN | DADGC  | 196 |
| cons    | 409 |                       |                  |         |        | 459 |

|         |     |                          |                   |                    |       |     |     |
|---------|-----|--------------------------|-------------------|--------------------|-------|-----|-----|
| ceTFB1  | 119 | -----                    | -----             | ETARP              | ----- | 123 |     |
| hsTFB1  | 119 | -----                    | -----             | KAFSE              | ----- | 123 |     |
| dmTFB1  | 312 | -----                    | -----             | -----              | IE    | 313 |     |
| agTFB1  | 211 | -----                    | -----             | EAFPD              | ----- | 215 |     |
| amTFB1  | 116 | -----                    | -----             | NLFPS              | ----- | 120 |     |
| xlTFB1  | 119 | -----                    | -----             | RAFPK              | ----- | 123 |     |
| trTFB1  | 119 | -----                    | -----             | RGFPR              | ----- | 123 |     |
| ciTFB1  | 134 | -----                    | -----             | QCFPQ              | ----- | 138 |     |
| hsTFB2  | 159 | -----                    | GGVIKPPAMSSRGLFKN | -----              | ----- | 175 |     |
| rnTFB2  | 159 | -----                    | QELVRPD           | VNSHTIFQN          | ----- | 174 |     |
| dmTFB2  | 141 | -----                    | -----             | GSRVADLLSD         | ----- | 150 |     |
| ptTFB2  | 156 | -----                    | GGVIKPPAMSSRGLFKN | -----              | ----- | 172 |     |
| mmuTFB2 | 158 | -----                    | QEVVRPD           | VSSQAIFQN          | ----- | 173 |     |
| btTFB2  | 158 | -----                    | HGMVTPPVMT        | SDMLFQY            | ----- | 174 |     |
| trTFB2  | 88  | -----                    | SGNLKPPAMFTDKLFTD | -----              | ----- | 104 |     |
| tnTFB2  | 240 | -----                    | SGNLKPPAMFTDKLFTD | -----              | ----- | 256 |     |
| scTFB   | 105 | -----                    | WSTYSNL           | IDEERIF            | ----- | 118 |     |
| spTFB   | 122 | -----                    | QTYED             | VYVSKVL            | ----- | 133 |     |
| klTFB   | 108 | -----                    | WETFLEM           | TNEDRVL            | ----- | 121 |     |
| egTFB   | 110 | -----                    | WESFVSL           | IDKIM              | ----- | 123 |     |
| caTFB   | 120 | -----                    | WETYNDL           | IDKDKLI            | ----- | 133 |     |
| ddTFB   | 117 | -----                    | -----             | KLLRD              | ----- | 121 |     |
| tbTFB   | 213 | EDAPLRNVQREKILRKRFGKYAAF | NHDTAS            | GQNSGSAAPSSDVFGCAF | SSE   | 263 |     |
| lmTFB   | 197 | EGAPLRSAQRRERLLRQRRARQPY | QHSDDTH           | CRGAEGAADPETA      | ----- | ASP | 242 |
| cons    | 460 |                          |                   |                    |       | 510 |     |

|         |     |                                                        |     |
|---------|-----|--------------------------------------------------------|-----|
| ceTFB1  | 124 | -----ESVDWHDS-----NLPAMHVIGNLPFNIASPLII--KYLRDMSYRRG   | 163 |
| hsTFB1  | 124 | ---SLK--RPWE-----DPPNVHIIIGNLPFSVSTPLII--KWLENISCRDG   | 163 |
| dmTFB1  | 314 | QHI-----PDTSQRIHLIGNLPFAISTRLLI--NWLDDLAARRG           | 350 |
| agTFB1  | 216 | ---CPP--HDWMD-----RKRAPVHLIGNLPFAISTRLLI--NWLRDMSLRTG  | 256 |
| amTFB1  | 121 | ---TEI--KAWT-----EKCPRIKLIIGNLPFNVSTPLII--KLLHAISEKRD  | 160 |
| xlTFB1  | 124 | ---HLI--KSWD-----DEPPNVHIIIGNLPFSVSTPLII--KWLEQVADRTG  | 163 |
| trTFB1  | 124 | ---DIS--KKWH-----EDPPNLHIIIGNLPFSVSTPLII--KWLENIANQSG  | 163 |
| ciTFB1  | 139 | ---ELA--KDWH-----KASPPFIVFGNLPFNVSLPLIF--KWFSEQISRKDG  | 178 |
| hsTFB2  | 176 | ---LGIEAVPWT-----ADIPLKVVGMPFSRGEKRALW--KLAYDLYSCTS    | 216 |
| rnTFB2  | 175 | ---LGIKAVPWS-----AGVPIKVFVGILPNKHERRLLW--KILFDLYSCES   | 215 |
| dmTFB2  | 151 | ---VPOKAFT-----DDINMLVFGAV---GSPFFK--HLINSLIFQTS       | 186 |
| ptTFB2  | 173 | ---LGIEAVPWT-----ADIPLKVI GMPFSRGEKRALW--KLAYDLYSCTS   | 213 |
| mmuTFB2 | 174 | ---LGIKAVPWS-----AGVPIKVFVGILPYKHERRILW--KILFDLYSCES   | 214 |
| btTFB2  | 175 | ---LGVKAHPWK-----KGFPLKVVGILPAKTERNTLW--KILHDLYSCSS    | 215 |
| trTFB2  | 105 | ---LGISEASWT-----DDIPVKVVGVL PMSNERGMLL--KMVYALFERLS   | 145 |
| tnTFB2  | 257 | ---LGISEASWT-----DDIPVKVVGMLPLRNERGMLL--KMVYALFERLS    | 297 |
| scTFB   | 119 | -----VPEVQSSDH-----INDKFLT VANVTGEGSEGLIM--QWLSCIGNKNW | 159 |
| spTFB   | 134 | -----DPRIQTEEEQKLSPHRELLFFAHLPHGYAGLLFVSQILDFLSARDW    | 179 |
| klTFB   | 122 | -----TPSMQKRDH-----IHNEFLIAANLTNKKGEQLYV--QYLQCIANQNW  | 162 |
| egTFB   | 124 | -----QPEVQTRDH-----IHDSFIVMGNLTDKRGEQLYM--QYLQCIANKNW  | 164 |
| caTFB   | 134 | -----QPQIKSFDT-----PHDELLILANWTGNKEESVLA--QWIKCCGHRNW  | 174 |
| ddTFB   | 122 | ---AGAETT NWK-----DKSKVKIIGNLPFNVGTHLML--KWIRQIAPRQG   | 162 |
| tbTFB   | 264 | SAAFEVSDRWWS-----DGD AKLEVIANLPFNII TELLM--RYAVDCSRKQN | 308 |
| lmTFB   | 243 | NAAFVDTNHRWS-----NGNAKVEVIANLPFEIIT ELLM--RYAADCSQHRG  | 287 |

|      |     |                                                                                      |     |
|------|-----|--------------------------------------------------------------------------------------|-----|
| cons | 511 |  | 561 |
|------|-----|--------------------------------------------------------------------------------------|-----|

|         |     |                                                         |     |
|---------|-----|---------------------------------------------------------|-----|
| ceTFB1  | 164 | VWQYGRVPLTLTFQLEVAKRLCSPIA--CDTRSRLSISIMSQYVAEPMVFQI    | 212 |
| hsTFB1  | 164 | PFVYGRTOQMTLTFQKEVAERLAANTG--SKQRSRLSVMAQYLCNVRHIFTI    | 212 |
| dmTFB1  | 351 | AFRRIDTCMTLTFQQEVAERICAPVG--GEQRCRLSVMSQVWTEPVMKFTI     | 399 |
| agTFB1  | 257 | AWSYGRASLTLTFQKEVAERIVAPIL--SDQRCRLSVMNQIWSTPELRFMI     | 305 |
| amTFB1  | 161 | AWTFGKTRMTLTFQKEVAERLIAQPL--DVQRCRLSVMAQAWTHPVLHFII     | 209 |
| xlTFB1  | 164 | PFTYGRTOQMTLTFQQEVAERLTASTK--NKQRSRLSISIMSQYLCNVKNCFTI  | 212 |
| trTFB1  | 164 | PFAYGRTRLTLTFQKEVAERLTASTG--SRQRSRLSISMAQYLCNTHSCFTI    | 212 |
| ciTFB1  | 179 | MFKLGRIPVLTLTFQREVVERFLAQTG--DKQRCRLSVSAQNFCDIDYKFII    | 227 |
| hsTFB2  | 217 | IYKFGRIEVMNFIGEKEFQKLMADPGN--PDLYHVL SVIWLQ LACEIKVLHME | 266 |
| rnTFB2  | 216 | IYRYGRVELNMFISEKEFRKLIATPKR--PDLYQV LGVLWQVACEIKFLHME   | 265 |
| dmTFB2  | 187 | LFNLGRCEMILAMPPIYIHLTCNNEIGYLIYRSTSVLFQILFEHKFIAKV      | 237 |
| ptTFB2  | 214 | IYKFGRIEVMNFIGEKEFQKLMADPGN--PDLYHVL SVIWLQ LACEIKVLHME | 263 |
| mmuTFB2 | 215 | IYRYGRVELNMFVSEKEFRKLIATPKR--PDLYQVM AVLWQVACDVKFLHME   | 264 |
| btTFB2  | 216 | VYKYGRAELNLFISEKECRKLTANPQT--PALYQSL SVLGQTACGIKVLCTE   | 265 |
| trTFB2  | 146 | IYRYGRIELNLFMSEKEYLKLSSQPGD--MMNYRASSVLWQMACDIELLHKE    | 195 |
| tnTFB2  | 298 | FYRYGRIELNLFISEKEYLKLTSRPGD--MMNYRAFSVLWQMACDIELLHKE    | 347 |
| scTFB   | 160 | LYRFGKVKMLLWMPSTTARKLLARPG--MHSRSKCSVVREAFDTDKLIAIS     | 208 |
| spTFB   | 180 | LGIFGRVRVLLWLPCSPVTLLGSRG--FSKRSKTSVFREAFDTSRVLAAS      | 228 |
| klTFB   | 163 | MQRFGLVKMLVWIPQQTARKLFAFVS--NKDRNRLTLLSELATNTKLVATS     | 211 |
| egTFB   | 165 | MQRFGLV RMLFVWPQT TAIKLLSPCG--FKSRSRCSVITEAVTDTRLIATT   | 213 |
| caTFB   | 175 | LMKYGKVRMVFIFAPSVSAMKFLGEPG--FKKRRRTGLKRDLYTDSRLIGVV    | 223 |
| ddTFB   | 163 | LYEFGRVPMYLMFQKELSDRICAQVG--SEEYSRLSVMVQQMCQPSIVYSI     | 211 |
| tbTFB   | 309 | LFVFGRVPLHVFTQQEVAECIIAPAG--SIHFSRLSVLCQCFFHTQLLRTF     | 357 |
| lmTFB   | 288 | LFAFGRVPIHVFTQREVAERILAPAG--SVQFSRLSVLCQCFFHVRLKQTF     | 336 |

|      |     |                                                                                      |     |
|------|-----|--------------------------------------------------------------------------------------|-----|
| cons | 562 |  | 612 |
|------|-----|--------------------------------------------------------------------------------------|-----|

|         |     |                     |               |       |                     |                 |                  |       |     |
|---------|-----|---------------------|---------------|-------|---------------------|-----------------|------------------|-------|-----|
| ceTFB1  | 213 | SGS-CF              | -----         | ----- | -----               | VPRPQVDVGVVRFV  | --P              | 232   |     |
| hsTFB1  | 213 | PGQA                | -----         | ----- | -----               | FVPKPEVDVGVVHFT | --P              | 232   |     |
| dmTFB1  | 400 | PGKA                | -----         | ----- | -----               | FVPKQVDVGVVVKLI | --P              | 419   |     |
| agTFB1  | 306 | SGRA                | -----         | ----- | -----               | FVPKPEVDVGVVTIV | --P              | 325   |     |
| amTFB1  | 210 | PGTA                | -----         | ----- | -----               | FIPKPKVDVGLVTFV | --P              | 229   |     |
| xlTFB1  | 213 | PGRA                | -----         | ----- | -----               | FIPKPKVDVGVVHLT | --P              | 232   |     |
| trTFB1  | 213 | PGRA                | -----         | ----- | -----               | FVPKPEVDVGVVHFT | --P              | 232   |     |
| ciTFB1  | 228 | AGGS                | -----         | ----- | -----               | FVPPPKVEVGVVKIV | --P              | 247   |     |
| hsTFB2  | 267 | PWS-SF              | DIYTRKGPLE    | ----- | NPKRRELLD           | -----           | QLQQKLYLIQMI     | --P   | 303 |
| rnTFB2  | 266 | PWS-SF              | SVHAENGHLE    | ----- | KSKHSESLN           | -----           | LLKQNLVLRMT      | --P   | 302 |
| dmTFB2  | 238 | PRE-DFL             | PQQMAYSPTK    | ----- | SSKLGKVQS           | -----           | INPEYLVLVKFT     | --P   | 275 |
| ptTFB2  | 264 | PWS-SF              | DIYTRKGPLE    | ----- | NPKRRELLD           | -----           | QLQQKLYLIQMT     | --P   | 300 |
| mmuTFB2 | 265 | PWS-SF              | SVHTENGHLE    | ----- | KSKHGESVN           | -----           | LLKQNLVLRMT      | --P   | 301 |
| btTFB2  | 266 | PSS-LF              | DTYAIKGELE    | ----- | KQRHRE              | -----           | SLEQNLCLVQLT     | --P   | 299 |
| trTFB2  | 196 | SWD-SF              | VMSSRPR       | ----- | IRSTKSK             | -----           | FPNDSLCLVRLR     | --P   | 227 |
| tnTFB2  | 348 | SWE-SF              | VTSSRRS       | ----- | VRSPKKN             | -----           | LPNDNLCLVRLR     | --P   | 379 |
| scTFB   | 209 | DANELK              | GFDSQCIEEW    | ----- | DPILFSAAE           | -----           | IWPTKGKPIALVEMD  | --P   | 249 |
| spTFB   | 229 | ESTLQKLCMGYSKEAKENY | QISPNPLLVSPPT | ----- | ITSEPHKEDLTLVEMCSKP | -----           | -----            | ----- | 279 |
| klTFB   | 212 | ENS-VK              | KFLPDCIEKF    | ----- | DPVIPSND            | -----           | KSPDDLSLVEIN     | --P   | 248 |
| egTFB   | 214 | PDNL-A              | SFGPGVLDKH    | ----- | DP                  | -----           | LILPENKTDYALLEVL | --P   | 247 |
| caTFB   | 224 | NSEKAP              | GLGYDARVLRD   | ----- | QPVLLEPSS           | -----           | AHRDEDYSVIEIS    | --P   | 264 |
| ddTFB   | 212 | PGT-AF              | -----         | ----- | -----               | VPPPKVDASVVAIE  | --P              | 231   |     |
| tbTFB   | 358 | REMT                | -----         | ----- | -----               | YYPKTAVLGALITLQ | --P              | 377   |     |
| lmTFB   | 337 | VDQT                | -----         | ----- | -----               | YYPRTVEVGAMLTLE | --P              | 356   |     |
| cons    | 613 |                     |               |       |                     |                 | . : . *          | 663   |     |

|         |     |                   |                |                  |              |                  |              |        |     |
|---------|-----|-------------------|----------------|------------------|--------------|------------------|--------------|--------|-----|
| ceTFB1  | 233 | RKTPL             | -----          | VNTSFEVLEKVC     | RQVFHYRQKYVT | KGLKTLYPEE       | -----        | LEDELS | 277 |
| hsTFB1  | 233 | LIQPK             | -----          | IEQPFFKLVEK      | VVQNVFQFRRKY | CHRGLRMLFPEA     | -----        | QRLEST | 277 |
| dmTFB1  | 420 | LKRPK             | -----          | TQLPFHLVERV      | VRHIFSMRQKYC | RRGYGTLLPPE      | -----        | DREEVA | 464 |
| agTFB1  | 326 | LQTPL             | -----          | TQVHFDTVEK       | VVRHIFSMRQKY | CRRGVANLYPPA     | -----        | VREELT | 370 |
| amTFB1  | 230 | LTIPR             | -----          | TKHEFSIFEK       | VTRHIFSFRRQY | GIRGVETLFPLE     | -----        | YRTELA | 274 |
| xlTFB1  | 233 | FVQPK             | -----          | IEQPFFKLVEK      | VVRCIFQFRRKY | CHHGVSILFPEE     | -----        | IRIQLT | 277 |
| trTFB1  | 233 | LVKAQ             | -----          | IQQPFFKLVEK      | VVRNVFQFRRKH | CHKGIEKLFPEA     | -----        | CRPEMT | 277 |
| ciTFB1  | 248 | KKTFD             | -----          | INLPFKKIDY       | VVKHTMHRKSKY | CKHSVKTMFPFK     | -----        | RSDLV  | 291 |
| hsTFB2  | 304 | RQNLFTKNLTPMNYN   | IFFHLLKHC      | FGRRSATVIDHLRSLT | -----        | -----            | -----        | PLDAR  | 348 |
| rnTFB2  | 303 | RRTLFTENLSPLNYDM  | FFHLVKHCF      | GKRNAPIIHHLRSLS  | -----        | -----            | -----        | TVDPI  | 347 |
| dmTFB2  | 276 | RNLHELCSQ         | -DLPALWFFIKQNY | VSRNRRIIPNLEKVV  | -----        | -----            | -----        | PGCGP  | 319 |
| ptTFB2  | 301 | RQNLFTKNLTPMNYN   | IFFHLLKHC      | FGRRSATVIDHLRSLT | -----        | -----            | -----        | PLDAR  | 345 |
| mmuTFB2 | 302 | RRTLFTENLSPLNYD   | IFFHLVKHCF     | GKRNAPIIRHLRSLS  | -----        | -----            | -----        | TVDPI  | 346 |
| btTFB2  | 300 | HRNLFTGTLTPFN     | YDVFFHMLRQC    | FMKRNAKLIDHLP    | SLSL         | -----            | -----        | PIDAV  | 344 |
| trTFB2  | 228 | HANLFSAGLTSSNAST  | LLMMVKQCLAKR   | KVKLIDRLNLWS     | -----        | -----            | -----        | PDSGS  | 272 |
| tnTFB2  | 380 | RADLFSAGLTSPSNAST | LLMMVKQCLAKR   | KVKLIDRLNLWS     | -----        | -----            | -----        | PDSGS  | 424 |
| scTFB   | 250 | IDFD              | -----          | FDVDNWDYVTR      | HLMILKR      | TPLNTVMDSLGHGGQQ | YFNSRI       | 293    |     |
| spTFB   | 280 | QDKQ              | -----          | LSIPVFE          | SIVRILLTCKAT | SLSKSIYYLGP      | AETLLPS      | 321    |     |
| klTFB   | 249 | RDHS              | -----          | IDLDHWF          | FVTQKLMILKSK | PVEEMIEILGHG     | ARDWFISRL    | 292    |     |
| egTFB   | 248 | LNHN              | -----          | MKLEYWDY         | CMQRLLVCKST  | PLEDILEVLGHG     | ASDFLKRI     | 291    |     |
| caTFB   | 265 | GKY               | -----          | TASQIENIEH       | FLSAIYLTN    | -KKLVD           | ILPTLAPGAMYM | 303    |     |
| ddTFB   | 232 | RISPLGD           | -EPVKDHHYF     | EFVCRELFS        | QRRKLSNTIK   | TLGKDAESL        | -----        | 276    |     |
| tbTFB   | 378 | RAVPLLPGLDAAT     | LIHFTDLLMRP    | -GQRGMTVYKAL     | QQHV         | -----            | -----        | PPEVA  | 421 |
| lmTFB   | 357 | RSVPLAHGLSASS     | LIHFTNLLMKP    | -GLRAATVHKSL     | SRFA         | -----            | -----        | PAELV  | 400 |
| cons    | 664 |                   |                |                  |              |                  |              | 714    |     |



|         |     |                    |          |               |                  |   |     |
|---------|-----|--------------------|----------|---------------|------------------|---|-----|
| ceTFB1  | 278 | DDLKCRIDPTTTS      | -----I   | 293           |                  |   |     |
| hsTFB1  | 278 | GRLLELADIDPTLRP    | -----R   | 293           |                  |   |     |
| dmTFB1  | 465 | EKLFQRAEVQDTRLRP   | -----F   | 480           |                  |   |     |
| agTFB1  | 371 | EQTFRADVDPLARS     | -----F   | 386           |                  |   |     |
| amTFB1  | 275 | QMMYKLSDLNPQTRP    | -----V   | 290           |                  |   |     |
| xlTFB1  | 278 | EQMLRLADVDPTRLRP   | -----T   | 293           |                  |   |     |
| trTFB1  | 278 | QEVQRADVDPALRP     | -----T   | 293           |                  |   |     |
| ciTFB1  | 292 | DEIFRKSGVDPLTRS    | -----N   | 307           |                  |   |     |
| hsTFB2  | 349 | -DILMQIGKQEDEKV    | -----V   | 363           |                  |   |     |
| rnTFB2  | 348 | -NILRQIRKRPGDTA    | -----A   | 362           |                  |   |     |
| dmTFB2  | 320 | -RLIINPKSSESVTP    | IYPDEL   | PKKLPQYSCQSTT | MSTRNYYPGINIYTQF | G | 369 |
| ptTFB2  | 346 | -DILMQIGKQEDEKV    | -----V   | 360           |                  |   |     |
| mmuTFB2 | 347 | -NILRQIRKNPGDTA    | -----A   | 361           |                  |   |     |
| btTFB2  | 345 | -HILKQIKKKKDV RV   | -----V   | 359           |                  |   |     |
| trTFB2  | 273 | -KLLAEMGMQEDILT    | -----G   | 287           |                  |   |     |
| tnTFB2  | 425 | -KLLAEMGMQEDILT    | -----G   | 439           |                  |   |     |
| scTFB   | 294 | -TDKDLLKKCPIDL     | -----T   | 307           |                  |   |     |
| spTFB   | 322 | ---FTQCGINIDMPV    | -----G   | 334           |                  |   |     |
| klTFB   | 293 | --DPVLLKKKPYEL     | -----T   | 305           |                  |   |     |
| egTFB   | 292 | --DPELLKKKPMQL     | -----T   | 304           |                  |   |     |
| caTFB   | 304 | -----AKDLPEEMLQKSS | -----Y   | 317           |                  |   |     |
| ddTFB   | 277 | ---LGD             | DIDPKIRT | -----Q        | 288              |   |     |
| tbTFB   | 422 | QYMLQELRTDGALTV    | -----L   | 437           |                  |   |     |
| lmTFB   | 401 | QYMLQELRMDGAMTV    | -----L   | 416           |                  |   |     |
| cons    | 715 | -----              | -----    | -----         | 765              |   |     |

|         |     |                     |                                     |       |     |
|---------|-----|---------------------|-------------------------------------|-------|-----|
| ceTFB1  | 294 | RLGIEQFADLAEGYNE    | QCIRY                               | ----- | 314 |
| hsTFB1  | 294 | QLSISHFKSLCDVYRKMCD | ED                                  | ----- | 314 |
| dmTFB1  | 481 | ELTVEQCLRLAEVYSEHLV | TR                                  | ----- | 501 |
| agTFB1  | 387 | QLSVAECLRIVEAYDGLV  | RER                                 | ----- | 407 |
| amTFB1  | 291 | ELTIENI             | DNL                                 | ----- | 300 |
| xlTFB1  | 294 | ELTMTHFKKLCNVYREMC  | DQN                                 | ----- | 314 |
| trTFB1  | 294 | ELTIPQIRALADAYAHL   | CTLE                                | ----- | 314 |
| ciTFB1  | 308 | ELENLHFRDLCYAYEE    | IADRI                               | ----- | 328 |
| hsTFB2  | 364 | NMHPQDFKTLFETIERSK  | DCA                                 | ----- | 384 |
| rnTFB2  | 363 | KMYPHDFKRLFETIERS   | SEDSV                               | ----- | 383 |
| dmTFB2  | 370 | DLLPSQ              | ILTLFSQFRQWPEYG                     | ----- | 390 |
| ptTFB2  | 361 | NMHPQDFKTLFETIERSK  | DCA                                 | ----- | 381 |
| mmuTFB2 | 362 | RMYPHDFKRLFETIEQ    | SEDSV                               | ----- | 382 |
| btTFB2  | 360 | DMYPKDFLRLFETIECS   | KDDT                                | ----- | 380 |
| trTFB2  | 288 | HVHPEEYLQLFQMDKS    | QEFT                                | ----- | 308 |
| tnTFB2  | 440 | HVYPEEYLRLFQLMDKS   | QEFT                                | ----- | 460 |
| scTFB   | 308 | NDEFIYLTKLFMWPFK    | PDIL                                | ----- | 328 |
| spTFB   | 335 | LLSAADFLTISKII      | QKYPFKH                             | ----- | 355 |
| klTFB   | 306 | YLEIDEIAKVFALWPFK   | PSLL                                | ----- | 326 |
| egTFB   | 305 | NQEFTKIASLYALWPFK   | PSI                                 | ----- | 324 |
| caTFB   | 318 | EFTCEDIIKLSEAYEN    | W                                   | ----- | 334 |
| ddTFB   | 289 | NLQIEQFVKITNRYIE    | FPNKIAIDHLEFENDGKTKRKEEKLKERVNKINTR | ----- | 339 |
| tbTFB   | 438 | DLTTEEVCKLATLWHR    | FLEAX                               | ----- | 458 |
| lmTFB   | 417 | DLSVVEVTRLACLWQ     | QFVTMS                              | ----- | 437 |
| cons    | 766 | -----               | -----                               | ----- | 816 |

|         |     |                                          |             |     |
|---------|-----|------------------------------------------|-------------|-----|
| ceTFB1  | 315 | -----                                    | PGLFLYDYTNK | 325 |
| hsTFB1  | 315 | -----                                    | PQLFAYNFREE | 325 |
| dmTFB1  | 502 | -----                                    |             | 501 |
| agTFB1  | 408 | -----                                    | PEIAAYDY    | 415 |
| amTFB1  | 301 | -----                                    |             | 300 |
| xlTFB1  | 315 | -----                                    | PHLFSYNYREE | 325 |
| trTFB1  | 315 | -----                                    | PDLQSYEFREE | 325 |
| ciTFB1  | 329 | -----                                    | PNLRKVDTYGE | 339 |
| hsTFB2  | 385 | -----                                    |             | 384 |
| rnTFB2  | 384 | -----                                    |             | 383 |
| dmTFB2  | 391 | -----                                    |             | 390 |
| ptTFB2  | 382 | -----                                    |             | 381 |
| mmuTFB2 | 383 | -----                                    |             | 382 |
| btTFB2  | 381 | -----                                    |             | 380 |
| trTFB2  | 309 | -----                                    |             | 308 |
| tnTFB2  | 461 | -----                                    |             | 460 |
| scTFB   | 329 | -----                                    |             | 328 |
| spTFB   | 356 | -----                                    |             | 355 |
| klTFB   | 327 | -----                                    |             | 326 |
| egTFB   | 325 | -----                                    |             | 324 |
| caTFB   | 335 | -----                                    |             | 334 |
| ddTFB   | 340 | IEKEKKKQELILEEKKLKKEQREKEKQELKENFEKQEIEI | QNLTKFDLEDK | 390 |
| tbTFB   | 459 | -----                                    |             | 458 |
| lmTFB   | 438 | -----                                    |             | 437 |
| cons    | 817 |                                          |             | 867 |

|         |     |             |           |                    |                  |                   |     |
|---------|-----|-------------|-----------|--------------------|------------------|-------------------|-----|
| ceTFB1  | 326 | LHNLEDLSKEP |           | NALPPPVPPIFAPAPTID | 353              |                   |     |
| hsTFB1  | 326 | LKRRKSKNEE  |           |                    | 335              |                   |     |
| dmTFB1  | 502 |             | PEVAAYDYR |                    | 510              |                   |     |
| agTFB1  | 416 |             |           | RAPK               | 419              |                   |     |
| amTFB1  | 301 |             | ISYHY     | LIQK               | 309              |                   |     |
| xlTFB1  | 326 | LRMKKLQGKS  |           |                    | 335              |                   |     |
| trTFB1  | 326 | LRL         |           |                    | 328              |                   |     |
| ciTFB1  | 340 | NEWSKTYFDA  |           |                    | 349              |                   |     |
| hsTFB2  | 385 |             | YKWLIDE   |                    | 391              |                   |     |
| rnTFB2  | 384 |             | FKWIYDY   |                    | 390              |                   |     |
| dmTFB2  | 391 |             | ESSFLASLE |                    | 399              |                   |     |
| ptTFB2  | 382 |             | YKWLIDE   |                    | 388              |                   |     |
| mmuTFB2 | 383 |             | FKWIYDY   |                    | 389              |                   |     |
| btTFB2  | 381 |             | CKWLIDE   |                    | 387              |                   |     |
| trTFB2  | 309 |             | QSWLYEE   |                    | 315              |                   |     |
| tnTFB2  | 461 |             | QSWLYEE   |                    | 467              |                   |     |
| scTFB   | 329 |             | MDFVDMY   |                    | 335              |                   |     |
| spTFB   | 356 |             | HLHL      | GT                 | 361              |                   |     |
| klTFB   | 327 |             | VDFYD     |                    | 331              |                   |     |
| egTFB   | 325 |             | YDFYD     |                    | 329              |                   |     |
| caTFB   | 335 |             |           |                    | 334              |                   |     |
| ddTFB   | 391 | IDNEKEEEEE  | INN       | SLLD               | SYKYQLKEALEKKEKI | DLLKQKKLENKDIIDQD | 441 |
| tbTFB   | 459 |             |           | SQQAXGSG           |                  |                   | 466 |
| lmTFB   | 438 |             |           | QQQPPQEGD          |                  |                   | 446 |
| cons    | 868 |             |           |                    |                  |                   | 918 |
