# Supplementary material for: Sequence and structural evolution of the KsgA/Dim1 methyltransferase family
Source: PubMed Central journal article supplement (PMC2614427; doi:10.1186/1756-0500-1-108), 2008-10-29
Supplement: 1756-0500-1-108-S3.pdf [file 1756-0500-1-108-S3.pdf]

T-COFFEE, Version\_5.31Fri Oct 26 17:01:36 2007

Cedric Notredame

CPU TIME:94 sec.

SCORE=42

\*

BAD AVG GOOD

\*

|       |   |    |
|-------|---|----|
| ErmA  | : | 43 |
| ErmB  | : | 39 |
| ErmC  | : | 43 |
| ErmD  | : | 41 |
| ErmE  | : | 43 |
| ErmF  | : | 42 |
| ErmG  | : | 42 |
| ErmH  | : | 44 |
| ErmN  | : | 40 |
| ErmO  | : | 42 |
| ErmQ  | : | 41 |
| ErmR  | : | 42 |
| ErmS  | : | 43 |
| ErmT  | : | 43 |
| ErmU  | : | 43 |
| ErmV  | : | 42 |
| ErmW  | : | 43 |
| ErmX  | : | 45 |
| ErmY  | : | 42 |
| ErmZ  | : | 37 |
| Erm30 | : | 44 |
| Erm31 | : | 44 |
| Erm33 | : | 43 |
| Erm34 | : | 41 |
| Erm35 | : | 41 |
| Erm36 | : | 44 |
| Erm37 | : | 36 |
| Erm38 | : | 45 |
| Erm39 | : | 45 |
| Erm40 | : | 43 |
| Erm41 | : | 38 |
| cons  | : | 42 |

|       |   |                                                          |    |
|-------|---|----------------------------------------------------------|----|
| ErmA  | 1 | -----                                                    | 0  |
| ErmB  | 1 | -----                                                    | 0  |
| ErmC  | 1 | -----                                                    | 0  |
| ErmD  | 1 | MKKK-----NHKYRGK-----                                    | 11 |
| ErmE  | 1 | MSSSDEQPRP-----RRRNQ--DRQ--HPNQNRPVLG                    | 28 |
| ErmF  | 1 | -----                                                    | 0  |
| ErmG  | 1 | -----                                                    | 0  |
| ErmH  | 1 | MAALLKRILRRR-----MAEKRSGRGRMAAARTTGAQSRKTAQRSG           | 41 |
| ErmN  | 1 | MPSRPRTDSP-----HRHEGPAGPA                                | 20 |
| ErmO  | 1 | MA-----                                                  | 2  |
| ErmQ  | 1 | MKAK-----SNN-----                                        | 7  |
| ErmR  | 1 | MAGP-----QDRPRGRGP--SSGRPQRPVGG-----                     | 24 |
| ErmS  | 1 | MARAPRSPHPARSRETSTRAHPPYGT RADRAPGRGR--DRDRSPDSPGNTSSRDG | 52 |
| ErmT  | 1 | -----                                                    | 0  |
| ErmU  | 1 | -----                                                    | 0  |
| ErmV  | 1 | MA-----                                                  | 2  |
| ErmW  | 1 | MSSI-----R-----RRHAAAS-----                              | 12 |
| ErmX  | 1 | -----                                                    | 0  |
| ErmY  | 1 | -----                                                    | 0  |
| ErmZ  | 1 | MTLK-----SPLP-----PQSVSAP-----                           | 15 |
| Erm30 | 1 | MAMRDSIP-----R                                           | 9  |
| Erm31 | 1 | -----M                                                   | 1  |
| Erm33 | 1 | -----                                                    | 0  |
| Erm34 | 1 | MTKK-----MNKYNGK-----                                    | 11 |
| Erm35 | 1 | -----                                                    | 0  |
| Erm36 | 1 | -----                                                    | 0  |
| Erm37 | 1 | -----                                                    | 0  |
| Erm38 | 1 | -----                                                    | 0  |
| Erm39 | 1 | -----                                                    | 0  |
| Erm40 | 1 | -----                                                    | 0  |
| Erm41 | 1 | -----                                                    | 0  |
| cons  | 1 | -----                                                    | 54 |

|       |    |      |                                                                                     |      |                                                                                     |        |                                                                                       |     |
|-------|----|------|-------------------------------------------------------------------------------------|------|-------------------------------------------------------------------------------------|--------|---------------------------------------------------------------------------------------|-----|
| ErmA  | 1  | ---- | MNQKNPKDTQNFITSKKHVKEILN                                                            | ---- | HTNI                                                                                | -----  | SKQDNVIEIG                                                                            | 38  |
| ErmB  | 1  | ---- | MNKNIKYSQNFLTSEKVLNQIIK                                                             | ---- | QLNL                                                                                | -----  | KETD TVYEIG                                                                           | 37  |
| ErmC  | 1  | ---- | MNEKNIKHSQNFITSKHNIDKIMT                                                            | ---- | NIRL                                                                                | -----  | NEHDNIFEIG                                                                            | 38  |
| ErmD  | 12 | KLN  | RGESPNFSGQHLMHNKKLIEEIVD                                                            | ---- | RANI                                                                                | -----  | SIDDTVLELG                                                                            | 52  |
| ErmE  | 29 | RTE  | RDRNRRQFGQNFLRDRKTIARIAE                                                            | ---- | TAEL                                                                                | -----  | RPDLPVLEAG                                                                            | 69  |
| ErmF  | 1  | MTK  | KKLPVRFTGQHFTIDKVLIKDAIR                                                            | ---- | QANI                                                                                | -----  | SNQD TVLDIG                                                                           | 41  |
| ErmG  | 1  | ---- | MNKVNIKDSQNFITSKYHIEKIMN                                                            | ---- | CISL                                                                                | -----  | DEKDNIFEIG                                                                            | 38  |
| ErmH  | 42 | RSE  | ADRRRRVHVGQNFLVDRET VQRFVR                                                          | ---- | FADP                                                                                | -----  | DPGEVVLEVG                                                                            | 82  |
| ErmN  | 21 | RLD  | RDEARRVWGQNFFRSAGSARRFAR                                                            | QLTG | AESA                                                                                | -----  | GNDSVTVEVG                                                                            | 65  |
| ErmO  | 3  | --R  | PTQRARTLSQNFLADRATAERVAH                                                            | ---- | LAVP                                                                                | -----  | DRGRRPLLLEVG                                                                          | 43  |
| ErmQ  | 8  | --Y  | RGKVDISVSQNFITSKNTIYKLIK                                                            | ---- | KTNI                                                                                | -----  | SKNDFVIEIG                                                                            | 46  |
| ErmR  | 25 | RSQ  | RDRDRRVLGQNFLRDPATIRRIAD                                                            | ---- | AADV                                                                                | -----  | DPDGLVVEAG                                                                            | 65  |
| ErmS  | 53 | GRS  | PDRARRELSQNFLARRAVAERVAR                                                            | ---- | LVRP                                                                                | -----  | AP--GGLLLEVG                                                                          | 93  |
| ErmT  | 1  | ---- | MNKKNIKDSQNFITSKHHINEILR                                                            | ---- | NVHL                                                                                | -----  | NTNDNIEIG                                                                             | 38  |
| ErmU  | 1  | MPS  | RYGSRQDLGQNFLVDPDI IKLIRR                                                           | ---- | APNE                                                                                | -----  | RKVPSL--IW                                                                            | 39  |
| ErmV  | 3  | --R  | PSRVSRALSQNFLADRAAAGQLAR                                                            | ---- | LAAP                                                                                | -----  | HGLPVPLLLEVG                                                                          | 43  |
| ErmW  | 13 | LDT  | PAVGGRHEL GQNFLVDRGVCTRIAE                                                          | ---- | VVSS                                                                                | -----  | TTAHPVLELG                                                                            | 54  |
| ErmX  | 1  | MST  | YGYGRHEHGQNFLTDHKIINSIVD                                                            | ---- | LVKQ                                                                                | -----  | TSG--PIIEIG                                                                           | 40  |
| ErmY  | 1  | ---- | MNKKDIKFSQNFITSKRHINKIMS                                                            | ---- | NLEL                                                                                | -----  | NRNDNVFEIG                                                                            | 38  |
| ErmZ  | 16 | ADS  | RSTARREW GQNFFRTAAACRFSA                                                            | ---- | QLDGS                                                                               | SDTIPP | DSPNDLMTVEIG                                                                          | 64  |
| Erm30 | 10 | RAD  | RDTLRREL GQNFLQDDRAVRNLVT                                                           | ---- | HVEG                                                                                | -----  | DGR--NVLEIG                                                                           | 49  |
| Erm31 | 2  | AFS  | PQGGRHEL GQNFLVDRSVIDEIDG                                                           | ---- | LVAR                                                                                | -----  | TKG--PILEIG                                                                           | 41  |
| Erm33 | 1  | ---- | MNKKNIKDSQNFITSKRNIDKIMT                                                            | ---- | NISL                                                                                | -----  | NEHDNIFEIG                                                                            | 38  |
| Erm34 | 12 | KLS  | RGEPPNFSGQHFMHNKRLLEIVD                                                             | ---- | KADV                                                                                | -----  | SVRDTVLELG                                                                            | 52  |
| Erm35 | 1  | MTK  | KKLPVRFTGQHFTIDKVLIKDAIK                                                            | ---- | ESNI                                                                                | -----  | NQHDTVLDIG                                                                            | 41  |
| Erm36 | 1  | MPT  | YRGGREHGQNFLTDHTTIDRLSR                                                             | ---- | LVGD                                                                                | -----  | STG--PIVEIG                                                                           | 40  |
| Erm37 | 1  | MSA  | LGRSRRAWGWHRLHDEWAAR--VVS                                                           | ---- | AAAV                                                                                | -----  | RPGELVFDIG                                                                            | 40  |
| Erm38 | 1  | MST  | PHHGRHEL GQNFLSDRRVIADIVE                                                           | ---- | IVSR                                                                                | -----  | TNG--PIIEIG                                                                           | 40  |
| Erm39 | 1  | MSS  | VHHGRHENGQNFLRDRRVVGDIVR                                                            | ---- | MVSH                                                                                | -----  | TAG--PIVEIG                                                                           | 40  |
| Erm40 | 1  | MSS  | KNQGRHEHGQNFLCDDRRVVADIVK                                                           | ---- | IVSH                                                                                | -----  | TTG--SIVEIG                                                                           | 40  |
| Erm41 | 1  | ---- | -----                                                                               | ---- | -----                                                                               | -----  | MDLG                                                                                  | 4   |
| cons  | 55 |      |  |      |  |        |  | 108 |

|       |     |                                             |                 |     |
|-------|-----|---------------------------------------------|-----------------|-----|
| ErmA  | 39  | SGKGFHTKELVKMSRSVTAIEIDGGLCQVTKEAVN-----    | PSENIKVIQTDIL   | 86  |
| ErmB  | 38  | TGKGHLTTKLAKISKQVTSIELDSHLFNLSSSEKLLK-----  | LNTRVTLIHQDIL   | 85  |
| ErmC  | 39  | SGKGFHTLELVQRCNFVTAIEIDHKLCKTTENKLV-----    | DHDNFQVLNKDIL   | 86  |
| ErmD  | 53  | AGKGALTTVLSQKAGKVLAVENDSKFVDILTRKTA-----    | QHSNTKIIHQDIM   | 100 |
| ErmE  | 70  | PGEGLLTRELADRARQVTSYEIDPRLAKSLREKLS-----    | GHPNIEVVNADFL   | 117 |
| ErmF  | 42  | AGKGFLLTVHLLKIANNVVAIENDTALVEHLRKLFS-----   | DARNVQVVGCDFR   | 89  |
| ErmG  | 39  | AGKGFHTAELVKRCNFVTAIEIDSKLCEVTRNKLL-----    | NYPNYQIVNDDIL   | 86  |
| ErmH  | 83  | AGNGAITRELARLCRRVVAYEIDRHFADRLREATA-----    | EDPRIEVVAGDFL   | 130 |
| ErmN  | 66  | PGAGRITKELVRDGHPIVAVEVDPHWADRLAE--L-----    | ELPNLTVVNDFFT   | 111 |
| ErmO  | 44  | AGNGALTEPLARRSRELHAYEIDPRLVPGLRARFA-----    | RSPHVHVVAGDFL   | 91  |
| ErmQ  | 47  | PGKGHITEALCEKSYWVTAIEIDRSLYGNLINKFK-----    | SKNNVTLINKDFL   | 94  |
| ErmR  | 66  | PGEGLLTRELARRAGRVRTYELDQRLARRLSTDLA-----    | QETSIEVVHADFL   | 113 |
| ErmS  | 94  | AGRGVLTEALAPYCGRLVAHEIDPRLLPALRDRFG-----    | GPHHAHVRISSGDFL | 143 |
| ErmT  | 39  | SGKGFHSFELAKRCNYVTAIEIDPKLCRITKNKLI-----    | EYENFQVINKDIL   | 86  |
| ErmU  | 40  | RRRGHVTLPLSRLGRPVTAVELDPRRVKRLSAR-----      | APENVKVVGEDIL   | 85  |
| ErmV  | 44  | AGKGALTELLAPRCRSLLAYEIDPRLVPVLRSRFA-----    | DAPHVRVLGEDFL   | 91  |
| ErmW  | 55  | AGDGAITRALVAANLPVTALELDPRRVRRLLQRTFA-----   | DGVTVVHGDML     | 100 |
| ErmX  | 41  | PGSGALTHPISHLGRAITAVEVDAKLAAKLTKKT-----     | ASASVEVVHDDFL   | 87  |
| ErmY  | 39  | SGKGFHTLELVQKCNVTVIEIDSNLCIQTONKVT-----     | NYDNFRIINKDIL   | 86  |
| ErmZ  | 65  | AGSGRVTKVLASPGTPLLAVEIDPRWARRLAEE-----      | SLPDVTVVNEDFL   | 110 |
| Erm30 | 50  | PGKGAIITEELVRSFDTVTVVEMDPHWAAHVRRKF-----    | EGERVTVFQGDFL   | 96  |
| Erm31 | 42  | PGDGALTLPLSRHGRPITAVELDGRRARQLGART-----     | PGHVTVVHHDFL    | 87  |
| Erm33 | 39  | SGKGFHTLELVQRCNFVTAIEIDHKLCKTTENKLV-----    | DHDNFQVLNKDIL   | 86  |
| Erm34 | 53  | AGKGALTTILSERADRVLAVEYDQKCIEALQWKLKLV-----  | GSKNVSILHQDIM   | 100 |
| Erm35 | 42  | AGKGFLLTVHLLKNVDKVI A IENDVALSQHLRKKFI----- | HAQNVQVVSCDYR   | 89  |
| Erm36 | 41  | PGQGRLTRELQKLGRSLTAVEIDSRLADRLASASQ-----    | FREQKHVTVVNADFL | 90  |
| Erm37 | 41  | AGEGALTAHLVRAGARVVAVELHPRRVGVLRERF-----     | PGITVVHADAA     | 85  |
| Erm38 | 41  | AGDGALTIPLQRLARPLTAVEVDARRARRLAQTARSAP      | GPASRPTEVVAADFL | 94  |
| Erm39 | 41  | AGDGALTLPLQRLGRPLTAIEIDLHRARRLAD-----       | RTTAEVIATDFL    | 84  |
| Erm40 | 41  | AGDGALTVPMQRLGRPLTAIEIDRRRAERLARRT-----     | TAHVVTADFL      | 84  |
| Erm41 | 5   | AGHGALTAHLVAAGARVLAVELHPPGRARHLRSRFA-----   | E-EDVRVAEADLL   | 51  |
| cons  | 109 | * . : : : * .                               | : *             | 162 |



|       |     |                                                         |     |
|-------|-----|---------------------------------------------------------|-----|
| ErmA  | 137 | N-LQR--ALGLLLMEVDIKMLKKVPPLYFHPKPSVDSVLIVLERH-QPLI-SK   | 185 |
| ErmB  | 136 | D-IHR--TLGLLLHTQVSIQQLLKLPAECFHPKPKVNSVLIKLTRH-TTDV-PD  | 184 |
| ErmC  | 137 | N-TKR--SLALFLMAEVDISILSMVPREYFHPKPKVNSLIRLNKR-KSRI-SH   | 185 |
| ErmD  | 152 | SK-FIKNSYVLAWRMWFDIGIVREISKEHFSPPPKVDSAMVRI TRKKDAPLS-H | 203 |
| ErmE  | 167 | GDYGRWSRLTVMTWPLFEWEFVE-----KVDSAIMRLRRRAEPLLE-G        | 208 |
| ErmF  | 141 | SR-KLYNPTYTVFYHTFFDLKLVYEVGPESFLPPPTVKSALLNIKRKH-LFF-DF | 191 |
| ErmG  | 137 | D-TNR--SLALLLMAEVDISILAKIPRYYFHPKPKVDSALIVLKRK-PAKM-AF  | 185 |
| ErmH  | 180 | GGYRRWSRLTVATWPEVEWRMGERISRRWFRPVPAVDSAVLRLERRPVPLIP-P  | 232 |
| ErmN  | 163 | GAYG-GNLFNAQWEPWYTFRRGLGFPRQEFAPVPGSDTETLLVRSRPRPLAP-W  | 214 |
| ErmO  | 141 | GDYGRWTLTTLVLTWPRHEWRLVGRVGRSRFCPAPRVDAGILRIERRPTALLTGA | 194 |
| ErmQ  | 147 | G-IPRESKLSLLLKTKFDIKIVHYFNREDFHPMPSVDCVLVYFKRKYKYDI-SK  | 198 |
| ErmR  | 163 | GDYGRWTALTVTTWPTFEWQYVAKVDRTLFTFPVPRVHSAIMRLRRRPQPLLRDA | 216 |
| ErmS  | 193 | GDYGRWSLLTVRTWPRHEWRLLGRVSRREFRPVPRVDSGILRIERRERPLLP-S  | 245 |
| ErmT  | 137 | N-TNR--SLALFLMTEVDISILSKIPREYFHPKPRVNSLIVLKRH-PSKI-SL   | 185 |
| ErmU  | 135 | G-IGGCSLVTAESWPWFDFSVLKRVPRFAFRPAPSVDGGILVIERRPEPLV---  | 184 |
| ErmV  | 141 | GDYGSWTRLTVLTWPRHEWRLAGRVGRRSFRPVPRVDAGIVRIERRRTPLLA-P  | 193 |
| ErmW  | 150 | G-VGGTMTLTAASWPWYEFRTLVERVPKTSFDPVPSVDGGILVIERRSAPLL-DD | 201 |
| ErmX  | 137 | G-VGASTMMTAQWSPWFTFHLGSRXPRSAFRPQPNVDGGILVIRRVGDPKIP-I  | 188 |
| ErmY  | 137 | N-TNR--SLALLLMTTEVDISILSKIPKEYFHPKPKINSLLIILKRH-PSKI-SY | 185 |
| ErmZ  | 162 | G-AWGGNLFNAQWEPWYSFDRGLAFSRQDFTPVPRADTQTLMVAPHRRPSV-PW  | 213 |
| Erm30 | 146 | G-RSGGSLLTTSWAPWYEFVHVRASSFRPMPRVDGGVLTIRRRPQPLLP-E     | 197 |
| Erm31 | 137 | G-VGGSTLLTAGWAPWYEFDLHSRVPARAFRPMPGVDGGVLAIRRRSAPLV---  | 186 |
| Erm33 | 137 | N-LQR--ALGLLLMEVDIKMLKKVPPLYFHPKPSVDSVLIVLERH-QPLI-SK   | 185 |
| Erm34 | 152 | S-VSPKDAYVMAWHMWFDIHYERGISRSSFSPPPKVDSALVRIVRKQHPLFP-Y  | 203 |
| Erm35 | 141 | SS-KVYNPLTVLYHTYYDLKFLYEINPESFLPPPTVKSALLRIERKQ-ISL-DI  | 191 |
| Erm36 | 140 | G-IGSSMMTAQWWPWIDFSLHGRVPRSAFKPAPSVDGGLEEMTRRPDPLLS-P   | 191 |
| Erm37 | 136 | SRNA-----RRFTLTVGLMLPRAFLPPPHVDSAVLVVRRRK-----          | 173 |
| Erm38 | 144 | A-VGGATMMTAQWWPWFEFGLARKVSAASFTRPAVDAGLLTITRRSRPLVD-V   | 195 |
| Erm39 | 134 | G-VGGATMMTAQWWPWFEFGLARKVSADAFRPRPSVDAGLLTIQRRAEPLLP-W  | 185 |
| Erm40 | 134 | A-VGGATMMTAQWWPWFEFGLARKVSADAFRPRPSVDAGLLTITRRREPLID-G  | 185 |
| Erm41 | 102 | -----KRAPVRHW---TLRAGITLPRSAFHHPQVDSVSLVIRRR-----       | 138 |
| cons  | 217 | .....                                                   | 270 |

|       |     |                                                         |     |
|-------|-----|---------------------------------------------------------|-----|
| ErmA  | 186 | KDYKKYRSFVYKVVN-----REYRVLF---TKNQFRQALKHANV---TNINK    | 226 |
| ErmB  | 185 | KYWKLYTYFVSKVVN-----REYRQLF---TKNQFHQAMKHAKV---NNLST    | 225 |
| ErmC  | 186 | KDKQKYNYFVMKVVN-----KEYKKIF---TKNQFNNSLKHAGI---DDLNN    | 226 |
| ErmD  | 204 | KHYIAFRGLAEYALKEPNIPLCVALRGIF---TPRQMKHLRKSLSKINNEKTVGT | 254 |
| ErmE  | 209 | AALERYESMVELCFTGVGGNIQASLLRKY---PRRRVEAAFDHAGVGGGAVVAY  | 259 |
| ErmF  | 192 | KFKAKYLAFISYLLEKPDLSVKTALKSIF---RKSQVRSISEKFGLNLNAQIVC  | 242 |
| ErmG  | 186 | KERKKYETFVMKVVN-----KEYEKLK---TKNQFNKALKHARI---YDINN    | 226 |
| ErmH  | 233 | GLMHDFRDLVETGFTGKGGSLDASLRRRF---PARRVAAGFRRARLEQGQVVVAY | 283 |
| ErmN  | 215 | SRHAAYQRFVEDVFNTSRLTIGEAAAR-AL---DRRAGPGWLRGARVPPGLRVKD | 264 |
| ErmO  | 195 | AARRDWADLVELGFSGVGGSLHASLRRRAH---SRRRVDAAFRAARLDPGVLVGE | 245 |
| ErmQ  | 199 | DEWNEYTSFISKSIN-----NLRDVF---TKNQIHAVIKYLGINL-NNISE     | 240 |
| ErmR  | 217 | AARSRFADMVEIGFVGKGGSLYRSLTREW---PRSKVDSAFARADVHHDEIVAF  | 267 |
| ErmS  | 246 | AALGDYHRMVELGFSGVGGSLYASLRRRAH---RAGPLDAAFRAARLDRSVVVAY | 296 |
| ErmT  | 186 | KDRKQYENFVMKVVN-----KEYIKLF---SKNQFYQALKYARI---DDLNN    | 226 |
| ErmU  | 185 | RERREYQDFVRQVFTGRGHGLREILQRIK-RVQDSDL SAWFRAHGVSPQALPKD | 237 |
| ErmV  | 194 | GADAGWRELVDLGFSGAGGSLHASLRRAR---PRRRVDAAFRAAGLDRDVLVGE  | 244 |
| ErmW  | 202 | RCVGDYQNLVREVYTGPGRGLAAILRTRL---PGREVDAWLRRERVDPAALPRD  | 252 |
| ErmX  | 189 | EQRKAFQAMVHTVFTARGRGIGIILRRAGLFS-RRSETQSWLRSRGIDPATLPPR | 242 |
| ErmY  | 186 | KDKKMYNNFVMKVVN-----QEYSKLF---TKNQFNKALNYAKI---KDLKN    | 226 |
| ErmZ  | 214 | REKAAYQRFVQRVFDTGQMTVGDAAARKVL---RRG-HAQFVRGAGVRPADRVKD | 263 |
| Erm30 | 198 | SASRAFQNF AEAVFTGPGRGLAEILRRH---IPKRTYRSLADRHGIPDGGLPKD | 248 |
| Erm31 | 187 | GQVKTYQDFVRQVFTGKGNGLKEILRRTG-RISQRDLATWLRRNEISPHALPKD  | 239 |
| Erm33 | 186 | KDYKKYRSFVYKVVN-----REYRVLF---TKNQFRQALKHANV---TNINK    | 226 |
| Erm34 | 204 | KEAKAMHDFLSYALNPNRAPLDQVLRGIF---TAPQAKKVRQAIGVKPETPVAM  | 254 |
| Erm35 | 192 | GLKVKYLNFVSYMLQKPDLTVKTAMKSIF---RKKQVRSISEKFGVDLNSKIVC  | 242 |
| Erm36 | 192 | DARESYRQFVHDVFTSRGRGIGIILANVSSSLGKRGALQLLKSEGISSSLPKD   | 245 |
| Erm37 | 174 | -----                                                   | 173 |
| Erm38 | 196 | ADRARYQALVHRVFTGRGHGMAQILQRL---PTPVPRTWLRANGIAPNSLPRQ   | 245 |
| Erm39 | 186 | ADRRAYQALVHRVFTGRGRGLAQILR-----PHVHPRWLSANGIHPSALPRA    | 232 |
| Erm40 | 186 | ADRRRYQALVHAVFTGRGRGVAQIVGPR-----VPRHWRHNGITPSALPRD     | 232 |
| Erm41 | 139 | -----                                                   | 138 |
| cons  | 271 | -----                                                   | 324 |





|       |     |                                                        |     |
|-------|-----|--------------------------------------------------------|-----|
| ErmA  | 244 | -----                                                  | 243 |
| ErmB  | 244 | -----                                                  | 243 |
| ErmC  | 245 | -----                                                  | 244 |
| ErmD  | 274 | -----HKW-----PRANKRKP-----                             | 284 |
| ErmE  | 314 | HRDRQASGHGDRRSSGRNRDDGRTGEREQGDQGRR-----               | 349 |
| ErmF  | 265 | -----                                                  | 264 |
| ErmG  | 245 | -----                                                  | 244 |
| ErmH  | 298 | -----                                                  | 297 |
| ErmN  | 292 | -----                                                  | 291 |
| ErmO  | 261 | -----                                                  | 260 |
| ErmQ  | 258 | -----                                                  | 257 |
| ErmR  | 299 | GRPGGGPRPDGRAGGGPRRDAG--GRRTDGDRGGRPRP-----PRG--G-     | 338 |
| ErmS  | 315 | -RPA-----                                              | 317 |
| ErmT  | 245 | -----                                                  | 244 |
| ErmU  | 263 | -----RGLPPRT-----SRGPRRNS-                             | 277 |
| ErmV  | 259 | -----                                                  | 258 |
| ErmW  | 281 | ARPG-----SVG--PDRSLPPRGLRSGP-----PRARRRGG-             | 309 |
| ErmX  | 261 | -----RH--RPISQSGSSQR-----PPQRKNRGRRR-                  | 284 |
| ErmY  | 245 | -----                                                  | 244 |
| ErmZ  | 283 | -----                                                  | 282 |
| Erm30 | 283 | GRDYDSETSRAAVPGS-----RRYGPTRGGEPCAPRAQVRQTKGRQ-----    | 323 |
| Erm31 | 280 | GHPGGRVS-----ASRRGV--PQARRGR-----                      | 300 |
| Erm33 | 244 | -----                                                  | 243 |
| Erm34 | 277 | -----PRRKR-----                                        | 281 |
| Erm35 | 265 | -----                                                  | 264 |
| Erm36 | 282 | -----                                                  | 281 |
| Erm37 | 179 | -----                                                  | 178 |
| Erm38 | 286 | DRPATHHKQTGPVVGQRQPQRG--RDADADPDDQRTAP--PVTRHHQGERRDED | 335 |
| Erm39 | 247 | -----                                                  | 246 |
| Erm40 | 251 | -----C-----                                            | 251 |
| Erm41 | 139 | -----                                                  | 138 |
| cons  | 379 | -----                                                  | 432 |
