# Supplementary material for: Sequence and structural evolution of the KsgA/Dim1 methyltransferase family
Source: PubMed Central journal article supplement (PMC2614427; doi:10.1186/1756-0500-1-108), 2008-10-29
Supplement: 1756-0500-1-108-S4.pdf [file 1756-0500-1-108-S4.pdf]

| Organism                                  | Domain   | KsgA/Dim1    | mtTFB     | mtTFB1    | mtTFB2    | Pfc1      |
|-------------------------------------------|----------|--------------|-----------|-----------|-----------|-----------|
| <i>Arabidopsis thaliana</i> (at)          | Eukarya  | NP_182264    |           |           |           | NP_171690 |
| <i>Dictyostelium discoideum</i> (dd)      | Eukarya  | XP_638864    | XP_637775 |           |           |           |
| <i>Leishmania braziliensis</i> (lb)       | Eukarya  | XP_001566655 |           |           |           |           |
| <i>Giardia lamblia</i> (gl)               | Eukarya  | XP_001704233 |           |           |           |           |
| <i>Plasmodium vivax</i> (pv)              | Eukarya  | XP_001616795 |           |           |           |           |
| <i>Homo sapiens</i> (hs)                  | Eukarya  | NP_055288    |           | NP_057104 | NP_071761 |           |
| <i>Saccharomyces cerevisiae</i> (sc)      | Eukarya  | NP_015057    | P14908    |           |           |           |
| <i>Drosophila melanogaster</i> (dm)       | Eukarya  |              |           | NP_996062 | NP_649971 |           |
| <i>Caenorhabditis elegans</i> (ce)        | Eukarya  |              |           | NP_491242 |           |           |
| <i>Methanopyrus kandleri</i> (mk)         | Archaea  | P_614217     |           |           |           |           |
| <i>Methanosaeta thermophila</i> (mth)     | Archaea  | YP_843421    |           |           |           |           |
| <i>Haloquadratum walsbyi</i> (hw)         | Archaea  | YP_658586    |           |           |           |           |
| <i>Methanoculleus marisnigri</i> (mma)    | Archaea  | YP_001047866 |           |           |           |           |
| <i>Methanocaldococcus jannaschii</i> (mj) | Archaea  | NP_248023    |           |           |           |           |
| <i>Pyrococcus horikoshii</i> (ph)         | Archaea  | NP_143656    |           |           |           |           |
| <i>Methanospaera stadtmanae</i> (ms)      | Archaea  | YP_448554    |           |           |           |           |
| <i>Picrophilus torridus</i> (pt)          | Archaea  | YP_023164    |           |           |           |           |
| <i>Archaeoglobus fulgidus</i> (af)        | Archaea  | NP_070611    |           |           |           |           |
| <i>Aeropyrum pernix</i> (ap)              | Archaea  | NP_147322    |           |           |           |           |
| <i>Sulfolobus solfataricus</i> (ss)       | Archaea  | NP_342254    |           |           |           |           |
| <i>Pyrobaculum aerophilum</i> (pa)        | Archaea  | NP_560585    |           |           |           |           |
| <i>Cenarchaeum symbiosum</i> (cs)         | Archaea  | YP_875407    |           |           |           |           |
| <i>Synechococcus elongatus</i> (se)       | Bacteria | YP_171912    |           |           |           |           |
| <i>Bacillus subtilis</i> (bs)             | Bacteria | NP_387923    |           |           |           |           |
| <i>Mycobacterium tuberculosis</i> (mtu)   | Bacteria | NP_215526    |           |           |           |           |
| <i>Thermus thermophilus</i> (tt)          | Bacteria | YP_005890    |           |           |           |           |
| <i>Bacteroides fragilis</i> (bf)          | Bacteria | YP_098063    |           |           |           |           |
| <i>Chlamydia trachomatis</i> (ct)         | Bacteria | NP_219862    |           |           |           |           |
| <i>Borrelia burgdorferi</i> (bb)          | Bacteria | NP_212724    |           |           |           |           |

|                                       |          |           |           |                    |                    |  |
|---------------------------------------|----------|-----------|-----------|--------------------|--------------------|--|
| <i>Escherichia coli</i> (ec)          | Bacteria | NP_414593 |           |                    |                    |  |
| <i>Anopheles gambiae</i> (ag)         | Eukarya  |           |           | XP_320403          |                    |  |
| <i>Apis mellifera</i> (am)            | Eukarya  |           |           | XP_001121333       |                    |  |
| <i>Xenopus laevis</i> (xl)            | Eukarya  |           |           | NP_001079850       |                    |  |
| <i>Takifugu rubripes</i> (tr)         | Eukarya  |           |           | ENSTRUP0000024475* | ENSTRUP0000026212* |  |
| <i>Ciona intestinalis</i> (ci)        | Eukarya  |           |           | ENSCINP0000008063* |                    |  |
| <i>Rattus norvegicus</i> (rn)         | Eukarya  |           |           |                    | P_001008294        |  |
| <i>Pan troglodytes</i> (pt)           | Eukarya  |           |           |                    | XP_514318          |  |
| <i>Mus musculus</i> (mmu)             | Eukarya  |           |           |                    | NP_032275          |  |
| <i>Bos taurus</i> (bt)                | Eukarya  |           |           |                    | NP_001033216       |  |
| <i>Tetraodon nigroviridis</i> (tn)    | Eukarya  |           |           |                    | CAG11026           |  |
| <i>Schizosaccharomyces pombe</i> (sp) | Eukarya  |           | NP_593495 |                    |                    |  |
| <i>Kluyveromyces lactis</i> (kl)      | Eukarya  |           | XP_451899 |                    |                    |  |
| <i>Eremothecium gossypii</i> (eg)     | Eukarya  |           | NP_986111 |                    |                    |  |
| <i>Candida albicans</i> (ca)          | Eukarya  |           | XP_722572 |                    |                    |  |
| <i>Trypanosoma brucei</i> (tb)        | Eukarya  |           | AAM97535  |                    |                    |  |
| <i>Leishmania major</i> (lm)          | Eukarya  |           | XP_843186 |                    |                    |  |
| Erm enzymes                           |          |           |           |                    |                    |  |
| Organism                              | Protein  | Accession |           |                    |                    |  |
| <i>Staphylococcus aureus</i>          | ErmA     | CAA26964  |           |                    |                    |  |
| <i>Enterococcus faecalis</i>          | ErmB     | CAA68299  |           |                    |                    |  |
| <i>Bacillus subtilis</i>              | ErmC     | P13956    |           |                    |                    |  |
| <i>Bacillus licheniformis</i>         | ErmD     | AAA22599  |           |                    |                    |  |
| <i>Saccharopolyspora erythraea</i>    | ErmE     | AAA26492  |           |                    |                    |  |
| <i>Bacteroides fragilis</i>           | ErmF     | AAA98217  |           |                    |                    |  |
| <i>Lysinibacillus sphaericus</i>      | ErmG     | AAA22419  |           |                    |                    |  |
| <i>Streptomyces thermotolerans</i>    | ErmH     | AAC32026  |           |                    |                    |  |

|                                       |       |           |  |  |  |  |
|---------------------------------------|-------|-----------|--|--|--|--|
| <i>Streptomyces fradiae</i>           | ErmN  | CAA66307  |  |  |  |  |
| <i>Streptomyces coelicolor</i>        | ErmO  | NP_630197 |  |  |  |  |
| <i>Clostridium perfringens</i>        | ErmQ  | AAC36915  |  |  |  |  |
| <i>Aeromicrobium erythreum</i>        | ErmR  | P09891    |  |  |  |  |
| <i>Streptomyces fradiae</i>           | ErmS  | AAA26742  |  |  |  |  |
| <i>Lactobacillus reuteri</i>          | ErmT  | Q00014    |  |  |  |  |
| <i>Streptomyces lincolnensis</i>      | ErmU  | AAB23456  |  |  |  |  |
| <i>Streptomyces viridochromogenes</i> | ErmV  | AAB51440  |  |  |  |  |
| <i>Micromonospora griseorubida</i>    | ErmW  | BAA03402  |  |  |  |  |
| <i>Corynebacterium jeikeium</i>       | ErmX  | AAK28910  |  |  |  |  |
| <i>Staphylococcus aureus</i>          | ErmY  | BAB20748  |  |  |  |  |
| <i>Streptomyces ambofaciens</i>       | ErmZ  | CAM96571  |  |  |  |  |
| <i>Streptomyces venezuelae</i>        | Erm30 | AAC69328  |  |  |  |  |
| <i>Streptomyces venezuelae</i>        | Erm31 | AAC69327  |  |  |  |  |
| <i>Staphylococcus sciuri</i>          | Erm33 | CAC86410  |  |  |  |  |
| <i>Bacillus clausii</i>               | Erm34 | AAP74657  |  |  |  |  |
| <i>Bacteroides coprosuis</i>          | Erm35 | AAK07612  |  |  |  |  |
| <i>Micrococcus luteus</i>             | Erm36 | AAL68827  |  |  |  |  |
| <i>Mycobacterium tuberculosis</i>     | Erm37 | CAA98396  |  |  |  |  |
| <i>Mycobacterium smegmatis</i>        | Erm38 | AAN86837  |  |  |  |  |
| <i>Mycobacterium fortuitum</i>        | Erm39 | AAR92235  |  |  |  |  |
| <i>Mycobacterium mageritense</i>      | Erm40 | AAS76623  |  |  |  |  |
| <i>Mycobacterium abscessus</i>        | Erm41 | ABW06859  |  |  |  |  |

\* Indicates Ensembl peptide ID numbers; all others are NCBI accession numbers.
